# Supplementary material for: Prognostic Significance of Dysregulated Epigenomic and Chromatin Modifiers in Cervical Cancer
Source: MDPI journal article supplement (doi:10.3390/cells10102665), 2021-10-05
Supplement: s1 [file s1]

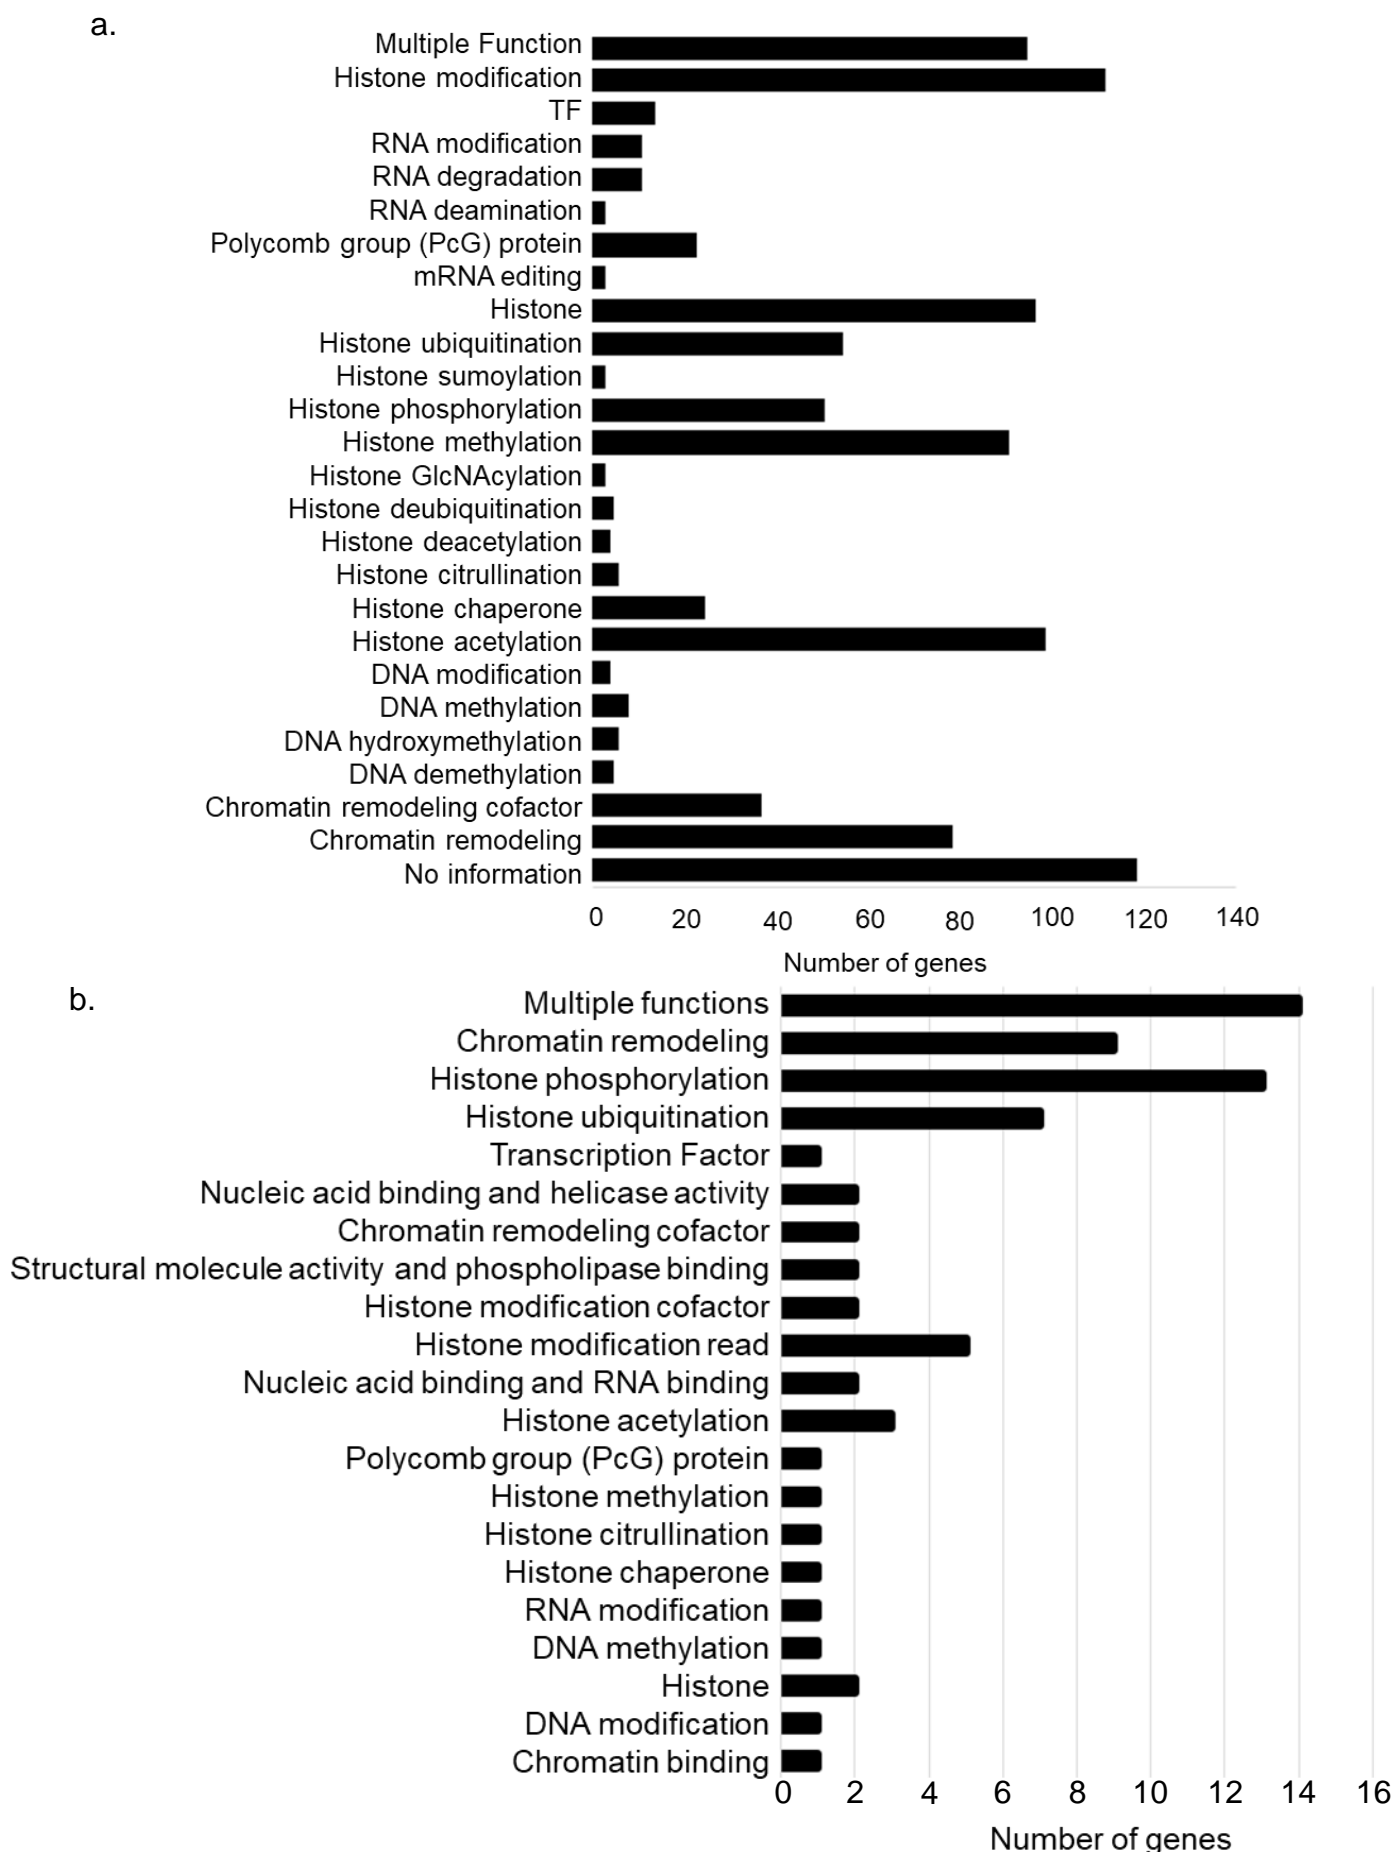

Supplementary figure S1: Epigenetic and chromatin remodeling regulators. a, Classes of molecules curated in the present study. Y-axis represents the functional classification and X-axis represents the number of genes in each functional group, and b, Functional sub-types of 73 differentially expressed epigenetic and chromatin regulators.

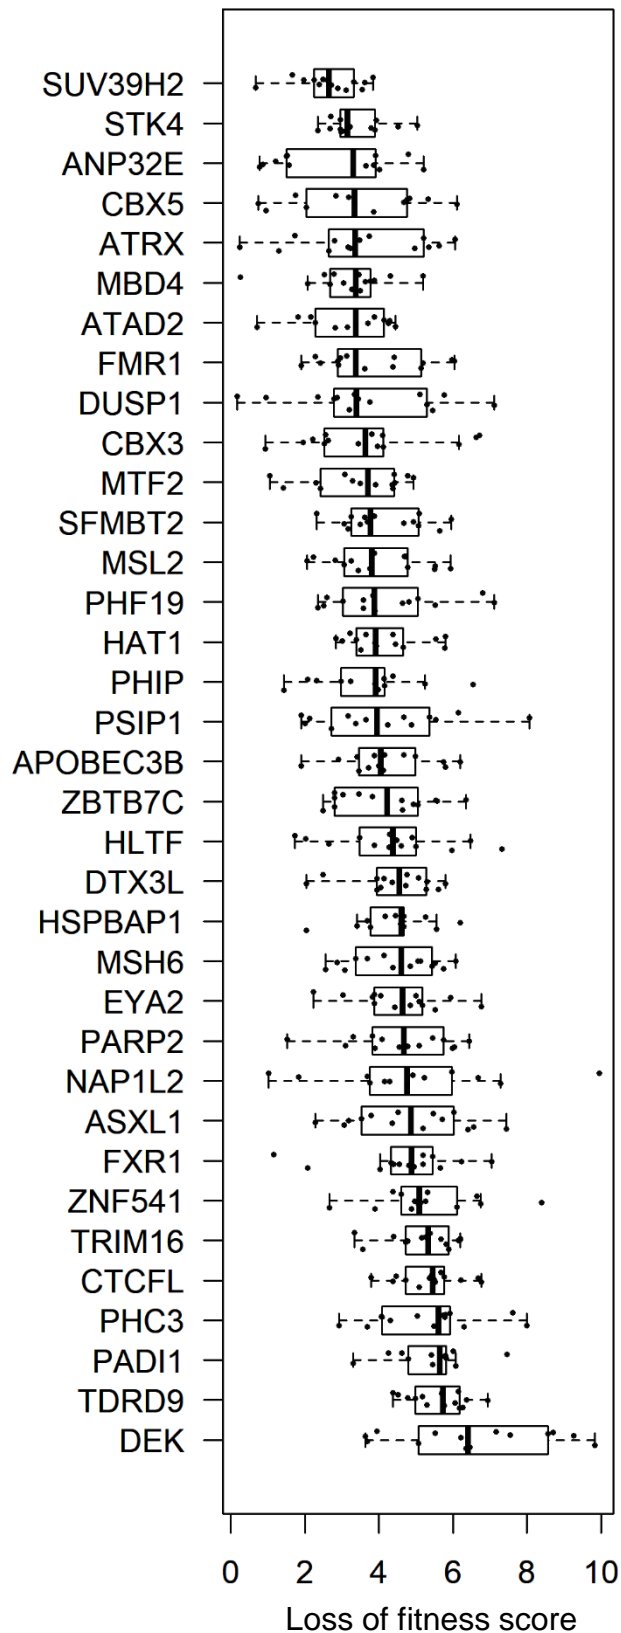

Supplementary figure S2: Genes with poor fitness dependency values in cervical cancer cell lines.
