# Supplementary material for: Prognostic Significance of Dysregulated Epigenomic and Chromatin Modifiers in Cervical Cancer
Source: Cells. 2021 Oct 5;10(10):2665. doi: 10.3390/cells10102665 (PMC8534148; doi:10.3390/cells10102665)
Supplement: Supplementary file 1 [file cells-10-02665-s001.zip]

Archive with 7 entries (7 files):
- Supplementary Table_1.xlsx
- Supplementary Table_2.xlsx
- Supplementary Table_3.xlsx
- Supplementary Table_4.xlsx
- Supplementary Table_5.xlsx
- Supplementary Table_6.xlsx
- Supplimentary_figures.pdf
