# Supplementary material for: Prognostic Significance of Dysregulated Epigenomic and Chromatin Modifiers in Cervical Cancer
Source: Cells. 2021 Oct 5;10(10):2665. doi: 10.3390/cells10102665 (PMC8534148; doi:10.3390/cells10102665)
Supplement: Supplementary file 1 [file cells-10-02665-s001.zip › Supplementary Table_1.xlsx]

## Sheet: Sheet1
Table 1: List of curated epigenetic and chromatin modifiers ome regulators and chromatin modifiers.
Gene_symbol	Function
CHTOP	0
DAXX	0
LBR	0
MOV10	0
TBL1XR1	0
ACTR3B	Chromatin remodeling
ACTR5	Chromatin remodeling
ATAD2	Chromatin remodeling
ATRX	Chromatin remodeling
BAHD1	Chromatin remodeling
BPTF	Chromatin remodeling
BRMS1	Chromatin remodeling
CDC6	Chromatin remodeling
CHAF1A	Chromatin remodeling
CHAF1B	Chromatin remodeling
CHD1	Chromatin remodeling
CHD1L	Chromatin remodeling
CHD2	Chromatin remodeling
CHD3	Chromatin remodeling
CHD4	Chromatin remodeling
CHD5	Chromatin remodeling
CHD6	Chromatin remodeling
CHD7	Chromatin remodeling
CHD8	Chromatin remodeling
CHD9	Chromatin remodeling
CTBP1	Chromatin remodeling
CTCFL	Chromatin remodeling
DEK	Chromatin remodeling
DMAP1	Chromatin remodeling
DNTTIP2	Chromatin remodeling
DPF2	Chromatin remodeling
DPF3	Chromatin remodeling
EPC2	Chromatin remodeling
ERCC6	Chromatin remodeling
GADD45A	Chromatin remodeling
GADD45B	Chromatin remodeling
GADD45G	Chromatin remodeling
GFI1	Chromatin remodeling
HCFC1	Chromatin remodeling
HELLS	Chromatin remodeling
HMG20B	Chromatin remodeling
HMGB1	Chromatin remodeling
HMGN1	Chromatin remodeling
HMGN2	Chromatin remodeling
HMGN3	Chromatin remodeling
HMGN4	Chromatin remodeling
HMGN5	Chromatin remodeling
HP1BP3	Chromatin remodeling
INO80	Chromatin remodeling
KEAP1	Chromatin remodeling
LRWD1	Chromatin remodeling
MAPKAPK3	Chromatin remodeling
MAZ	Chromatin remodeling
MBD5	Chromatin remodeling
MBD6	Chromatin remodeling
NASP	Chromatin remodeling
NBN	Chromatin remodeling
PARG	Chromatin remodeling
PARP1	Chromatin remodeling
PCNA	Chromatin remodeling
PHF10	Chromatin remodeling
PPM1G	Chromatin remodeling
PSIP1	Chromatin remodeling
RAD54B	Chromatin remodeling
RAD54L	Chromatin remodeling
RAD54L2	Chromatin remodeling
RAI1	Chromatin remodeling
RCC1	Chromatin remodeling
SAFB	Chromatin remodeling
SMARCA5	Chromatin remodeling
SMARCAD1	Chromatin remodeling
SMARCAL1	Chromatin remodeling
SMARCD1	Chromatin remodeling
SS18L1	Chromatin remodeling
SS18L2	Chromatin remodeling
SSRP1	Chromatin remodeling
TNP1	Chromatin remodeling
TNP2	Chromatin remodeling
TONSL	Chromatin remodeling
TOP2A	Chromatin remodeling
TOP2B	Chromatin remodeling
ZNF541	Chromatin remodeling
ACTB	Chromatin remodeling cofactor
ACTL6A	Chromatin remodeling cofactor
ACTL6B	Chromatin remodeling cofactor
ACTR6	Chromatin remodeling cofactor
ADNP	Chromatin remodeling cofactor
ANP32A	Chromatin remodeling cofactor
ARID1A	Chromatin remodeling cofactor
ARID2	Chromatin remodeling cofactor
CUL1	Chromatin remodeling cofactor
CUL2	Chromatin remodeling cofactor
DPF1	Chromatin remodeling cofactor
HLTF	Chromatin remodeling cofactor
HMG20A	Chromatin remodeling cofactor
INO80B	Chromatin remodeling cofactor
INO80C	Chromatin remodeling cofactor
INO80D	Chromatin remodeling cofactor
INO80E	Chromatin remodeling cofactor
MLLT1	Chromatin remodeling cofactor
MTA1	Chromatin remodeling cofactor
MTA3	Chromatin remodeling cofactor
MYBBP1A	Chromatin remodeling cofactor
MYO1C	Chromatin remodeling cofactor
NCOA2	Chromatin remodeling cofactor
PARP2	Chromatin remodeling cofactor
RUVBL2	Chromatin remodeling cofactor
SATB1	Chromatin remodeling cofactor
SATB2	Chromatin remodeling cofactor
SMARCC1	Chromatin remodeling cofactor
SMARCC2	Chromatin remodeling cofactor
SMARCD2	Chromatin remodeling cofactor
SMARCD3	Chromatin remodeling cofactor
SMARCE1	Chromatin remodeling cofactor
SP100	Chromatin remodeling cofactor
YAF2	Chromatin remodeling cofactor
NFRKB	Chromatin remodeling cofactor, TF
VDR	Chromatin remodeling cofactor, TF
ZHX1	Chromatin remodeling, Histone acetylation, Histone methylation
TLE1	Chromatin remodeling, Histone modification cofactor
CXXC1	Chromatin remodeling, TF
FOXA1	Chromatin remodeling, TF
IKZF1	Chromatin remodeling, TF
AICDA	DNA demethylation
APEX1	DNA demethylation
PRDM14	DNA demethylation
APOBEC1	DNA demethylation, mRNA editing
APOBEC2	DNA demethylation, mRNA editing
APOBEC3A	DNA demethylation, mRNA editing
APOBEC3B	DNA demethylation, mRNA editing
APOBEC3C	DNA demethylation, mRNA editing
APOBEC3D	DNA demethylation, mRNA editing
APOBEC3F	DNA demethylation, mRNA editing
APOBEC3G	DNA demethylation, mRNA editing
APOBEC3H	DNA demethylation, mRNA editing
TDG	DNA hydroxymethylation
TET1	DNA hydroxymethylation
TET2	DNA hydroxymethylation
TET3	DNA hydroxymethylation
TFPT	DNA hydroxymethylation, Chromatin remodeling cofactor
CENPC	DNA methylation
CUL5	DNA methylation
DNMT1	DNA methylation
DNMT3A	DNA methylation
DNMT3B	DNA methylation
UBR7	DNA methylation
MBD4	DNA modification
RMI1	DNA modification
ARID4A	Histone acetylation
ARID4B	Histone acetylation
ATXN7	Histone acetylation
BANP	Histone acetylation
BRCA2	Histone acetylation
BRPF3	Histone acetylation
CDY1	Histone acetylation
CDY1B	Histone acetylation
CDY2A	Histone acetylation
CDY2B	Histone acetylation
CDYL	Histone acetylation
CLOCK	Histone acetylation
CREBBP	Histone acetylation
EID1	Histone acetylation
EID2	Histone acetylation
EID2B	Histone acetylation
ELP2	Histone acetylation
ELP3	Histone acetylation
ELP4	Histone acetylation
ELP5	Histone acetylation
ELP6	Histone acetylation
EP300	Histone acetylation
GSE1	Histone acetylation
GTF3C4	Histone acetylation
HAT1	Histone acetylation
HDAC1	Histone acetylation
HDAC10	Histone acetylation
HDAC11	Histone acetylation
HDAC2	Histone acetylation
HDAC3	Histone acetylation
HDAC4	Histone acetylation
HDAC5	Histone acetylation
HDAC6	Histone acetylation
HDAC7	Histone acetylation
HDAC8	Histone acetylation
HDAC9	Histone acetylation
HIF1AN	Histone acetylation
JADE1	Histone acetylation
JADE2	Histone acetylation
JADE3	Histone acetylation
KANSL2	Histone acetylation
KANSL3	Histone acetylation
KAT2A	Histone acetylation
KAT2B	Histone acetylation
KAT5	Histone acetylation
KAT6A	Histone acetylation
KAT6B	Histone acetylation
KAT7	Histone acetylation
KAT8	Histone acetylation
MBD3	Histone acetylation
MBIP	Histone acetylation
MCRS1	Histone acetylation
MEAF6	Histone acetylation
MORF4L2	Histone acetylation
MRGBP	Histone acetylation
MTA2	Histone acetylation
NAA60	Histone acetylation
NAT10	Histone acetylation
NCOA1	Histone acetylation
NCOA3	Histone acetylation
NCOR1	Histone acetylation
NCOR2	Histone acetylation
NIPBL	Histone acetylation
NSL1	Histone acetylation
PHF12	Histone acetylation
PHF20	Histone acetylation
RCOR3	Histone acetylation
RLIM	Histone acetylation
SAP130	Histone acetylation
SAP18	Histone acetylation
SAP25	Histone acetylation
SAP30	Histone acetylation
SAP30L	Histone acetylation
SIRT6	Histone acetylation
SIRT7	Histone acetylation
SMYD4	Histone acetylation
SUDS3	Histone acetylation
SUPT3H	Histone acetylation
TADA2B	Histone acetylation
TADA3	Histone acetylation
TAF1	Histone acetylation
TAF5	Histone acetylation
TAF5L	Histone acetylation
TRIM16	Histone acetylation
TRIM27	Histone acetylation
TRRAP	Histone acetylation
VPS72	Histone acetylation
YEATS4	Histone acetylation
YWHAB	Histone acetylation
YWHAE	Histone acetylation
ZBTB16	Histone acetylation
ZMYM3	Histone acetylation
ZMYND8	Histone acetylation
ZNF532	Histone acetylation
ZNF592	Histone acetylation
ZNF687	Histone acetylation
ZNF711	Histone acetylation
EP400	Histone acetylation, Chromatin remodeling
ING3	Histone acetylation, Chromatin remodeling
JDP2	Histone acetylation, Chromatin remodeling
PHF19	Histone acetylation, Chromatin remodeling
SMARCA1	Histone acetylation, Chromatin remodeling
SRCAP	Histone acetylation, Chromatin remodeling
ZNHIT1	Histone acetylation, Chromatin remodeling cofactor
TAF10	Histone acetylation, Histone chaperone
TAF12	Histone acetylation, Histone chaperone
DNAJC1	Histone acetylation, Histone deacetylation
RCOR1	Histone acetylation, Histone methylation
SIRT1	Histone acetylation, Histone methylation
SIRT2	Histone acetylation, Histone methylation
BRCA1	Histone acetylation, Histone methylation, Histone ubiquitination, TF activator, TF repressor
ZBTB33	Histone acetylation, Histone methylation, TF repressor
ZMYM2	Histone acetylation, TF
ATF2	Histone acetylation, TF activator
REST	Histone acetylation, TF activator, TF repressor
SIN3A	Histone acetylation, TF activator, TF repressor
SPEN	Histone acetylation, TF activator, TF repressor
TP53	Histone acetylation, TF activator, TF repressor
SIN3B	Histone acetylation, TF repressor
ZNF217	Histone acetylation, TF repressor
ZNF516	Histone acetylation, TF repressor
ANP32B	Histone chaperone
ASF1A	Histone chaperone
ASF1B	Histone chaperone
BAZ1A	Histone chaperone
CHRAC1	Histone chaperone
DR1	Histone chaperone
HJURP	Histone chaperone
NAP1L1	Histone chaperone
NCL	Histone chaperone
NPM1	Histone chaperone
NPM2	Histone chaperone
POLE3	Histone chaperone
RBBP4	Histone chaperone
RBBP7	Histone chaperone
SUPT7L	Histone chaperone
TADA1	Histone chaperone
TAF4	Histone chaperone
TAF6	Histone chaperone
TAF6L	Histone chaperone
TAF8	Histone chaperone
TAF9	Histone chaperone
TAF9B	Histone chaperone
YEATS2	Histone chaperone
ANP32E	Histone chaperone, Histone modification read
PADI1	Histone citrullination
PADI2	Histone citrullination
PADI3	Histone citrullination
PADI4	Histone citrullination
BCORL1	Histone deacetylation
BRMS1L	Histone deacetylation
BAZ2A	Histone deacetylation, Chromatin remodeling
ATXN7L3	Histone deubiquitination
BABAM1	Histone deubiquitination
BRCC3	Histone deubiquitination
ASXL1	Histone deubiquitination, Polycomb group (PcG) protein
BAP1	Histone deubiquitination, Polycomb group (PcG) protein
OGT	Histone GlcNAcylation
AEBP2	Histone methylation
ASH1L	Histone methylation
ASH2L	Histone methylation
ATF7IP	Histone methylation
CARM1	Histone methylation
CDC73	Histone methylation
CLNS1A	Histone methylation
CTBP2	Histone methylation
DOT1L	Histone methylation
DPY30	Histone methylation
EHMT1	Histone methylation
EHMT2	Histone methylation
FBL	Histone methylation
HR	Histone methylation
JARID2	Histone methylation
JMJD1C	Histone methylation
JMJD6	Histone methylation
KDM1A	Histone methylation
KDM1B	Histone methylation
KDM2A	Histone methylation
KDM2B	Histone methylation
KDM3A	Histone methylation
KDM3B	Histone methylation
KDM4A	Histone methylation
KDM4B	Histone methylation
KDM4C	Histone methylation
KDM4D	Histone methylation
KDM4E	Histone methylation
KDM5A	Histone methylation
KDM5B	Histone methylation
KDM5C	Histone methylation
KDM5D	Histone methylation
KDM6A	Histone methylation
KDM6B	Histone methylation
KDM7A	Histone methylation
KDM8	Histone methylation
KMT2A	Histone methylation
KMT2B	Histone methylation
KMT2C	Histone methylation
KMT2D	Histone methylation
KMT2E	Histone methylation
MEN1	Histone methylation
MLLT10	Histone methylation
MLLT6	Histone methylation
NCOA6	Histone methylation
NSD1	Histone methylation
PAXIP1	Histone methylation
PHF2	Histone methylation
PHF21A	Histone methylation
PHF8	Histone methylation
POGZ	Histone methylation
PRDM1	Histone methylation
PRDM11	Histone methylation
PRDM12	Histone methylation
PRDM13	Histone methylation
PRDM2	Histone methylation
PRDM4	Histone methylation
PRDM5	Histone methylation
PRDM6	Histone methylation
PRDM7	Histone methylation
PRDM8	Histone methylation
PRDM9	Histone methylation
PRKCB	Histone methylation
PRMT1	Histone methylation
PRMT2	Histone methylation
PRMT5	Histone methylation
PRMT6	Histone methylation
PRMT7	Histone methylation
PRMT8	Histone methylation
PRMT9	Histone methylation
RBBP5	Histone methylation
SETD1A	Histone methylation
SETD1B	Histone methylation
SETD2	Histone methylation
SETD3	Histone methylation
SETD5	Histone methylation
SETD7	Histone methylation
SETDB1	Histone methylation
SETDB2	Histone methylation
SETMAR	Histone methylation
SMYD1	Histone methylation
SMYD2	Histone methylation
SMYD3	Histone methylation
SUPT6H	Histone methylation
SUV39H2	Histone methylation
UBN1	Histone methylation
WDR77	Histone methylation
WDR82	Histone methylation
ZMYND11	Histone methylation
PIWIL4	Histone methylation, Chromatin remodeling
SETD6	Histone methylation, Chromatin remodeling
ZRANB3	Histone methylation, Chromatin remodeling
HCFC2	Histone methylation, Histone acetylation
HSPA1A	Histone methylation, Histone acetylation
HSPA1B	Histone methylation, Histone acetylation
KANSL1	Histone methylation, Histone acetylation
LAS1L	Histone methylation, Histone acetylation
PAGR1	Histone methylation, Histone acetylation
PELP1	Histone methylation, Histone acetylation
PRPF31	Histone methylation, Histone acetylation
TAF7	Histone methylation, Histone acetylation
TEX10	Histone methylation, Histone acetylation
MAX	Histone methylation, Histone acetylation, TF activator, TF repressor
MGA	Histone methylation, Histone acetylation, TF activator, TF repressor
MBD2	Histone methylation, Histone acetylation, TF repressor
MECP2	Histone methylation, Histone acetylation, TF repressor
CIT	Histone methylation, Histone phosphorylation
SUV39H1	Histone methylation, Histone phosphorylation
SUZ12	Histone methylation, Histone ubiquitination, TF repressor
EZH1	Histone methylation, Polycomb group (PcG) protein
EZH2	Histone methylation, Polycomb group (PcG) protein
RARA	Histone methylation, TF activator, TF repressor
MBD1	Histone methylation, TF repressor
PRDM16	Histone methylation, TF repressor
ALKBH1	Histone modification
APBB1	Histone modification
ARRB1	Histone modification
CSNK2A1	Histone modification
FBRS	Histone modification
FBRSL1	Histone modification
MST1	Histone modification
NFYC	Histone modification
PRKCD	Histone modification
SET	Histone modification
TFDP1	Histone modification
CDK9	Histone modification cofactor
CTR9	Histone modification cofactor
ERBB4	Histone modification cofactor
GFI1B	Histone modification cofactor
NAP1L2	Histone modification cofactor
NAP1L4	Histone modification cofactor
PPARGC1A	Histone modification cofactor
PPP4R2	Histone modification cofactor
RRP8	Histone modification cofactor
TLE2	Histone modification cofactor
ZBTB7C	Histone modification cofactor
ATN1	Histone modification erase cofactor
SNAI2	Histone modification erase cofactor
TLE4	Histone modification erase cofactor, TF
ACTR8	Histone modification read
ASXL2	Histone modification read
ATAD2B	Histone modification read
BAZ2B	Histone modification read
BRD1	Histone modification read
BRD2	Histone modification read
BRD3	Histone modification read
BRD4	Histone modification read
BRD7	Histone modification read
BRD8	Histone modification read
BRD9	Histone modification read
BRDT	Histone modification read
BRPF1	Histone modification read
BRWD1	Histone modification read
BRWD3	Histone modification read
C17orf49	Histone modification read
CBX1	Histone modification read
CBX2	Histone modification read
CBX3	Histone modification read
CBX4	Histone modification read
CBX5	Histone modification read
CBX6	Histone modification read
CBX7	Histone modification read
CBX8	Histone modification read
CDYL2	Histone modification read
CECR2	Histone modification read
CIR1	Histone modification read
CRB2	Histone modification read
DNAJC2	Histone modification read
DNMT3L	Histone modification read
DPPA3	Histone modification read
GATAD1	Histone modification read
GATAD2A	Histone modification read
GATAD2B	Histone modification read
GLYR1	Histone modification read
HDGFL2	Histone modification read
HIRA	Histone modification read
HIRIP3	Histone modification read
ING1	Histone modification read
ING2	Histone modification read
ING4	Histone modification read
ING5	Histone modification read
L3MBTL1	Histone modification read
L3MBTL2	Histone modification read
L3MBTL3	Histone modification read
L3MBTL4	Histone modification read
MDC1	Histone modification read
MORF4L1	Histone modification read
MPHOSPH8	Histone modification read
MSH6	Histone modification read
MSL3	Histone modification read
PBRM1	Histone modification read
PDP1	Histone modification read
PHF13	Histone modification read
PHF14	Histone modification read
PHF20L1	Histone modification read
PHIP	Histone modification read
RAG2	Histone modification read
RSF1	Histone modification read
SMARCB1	Histone modification read
SUPT16H	Histone modification read
TAF1L	Histone modification read
TAF3	Histone modification read
TDRD3	Histone modification read
TDRD7	Histone modification read
TP53BP1	Histone modification read
TRIM24	Histone modification read
TRIM28	Histone modification read
TRIM33	Histone modification read
UHRF2	Histone modification read
UIMC1	Histone modification read
WDR5	Histone modification read
YWHAZ	Histone modification read
ZCWPW1	Histone modification read
ZZZ3	Histone modification read
AIRE	Histone modification read, TF
SP140	Histone modification read, TF
TADA2A	Histone modification read, TF
HLCS	Histone modification write
MAP3K7	Histone modification write
ARNTL	Histone modification write cofactor, TF
ATM	Histone phosphorylation
ATR	Histone phosphorylation
AURKA	Histone phosphorylation
AURKB	Histone phosphorylation
AURKC	Histone phosphorylation
BAZ1B	Histone phosphorylation
BUB1	Histone phosphorylation
CDK1	Histone phosphorylation
CDK17	Histone phosphorylation
CDK2	Histone phosphorylation
CDK3	Histone phosphorylation
CDK5	Histone phosphorylation
CDK7	Histone phosphorylation
CHEK1	Histone phosphorylation
CHUK	Histone phosphorylation
DAPK3	Histone phosphorylation
EYA1	Histone phosphorylation
EYA2	Histone phosphorylation
EYA3	Histone phosphorylation
EYA4	Histone phosphorylation
JAK2	Histone phosphorylation
MASTL	Histone phosphorylation
NEK6	Histone phosphorylation
NEK9	Histone phosphorylation
PAK2	Histone phosphorylation
PBK	Histone phosphorylation
PKM	Histone phosphorylation
PKN1	Histone phosphorylation
PPP2CA	Histone phosphorylation
PPP4C	Histone phosphorylation
PRKAA1	Histone phosphorylation
PRKAA2	Histone phosphorylation
PRKAB1	Histone phosphorylation
PRKAB2	Histone phosphorylation
PRKAG1	Histone phosphorylation
PRKAG2	Histone phosphorylation
PRKAG3	Histone phosphorylation
PRKCA	Histone phosphorylation
PRKDC	Histone phosphorylation
PRR14	Histone phosphorylation
RPS6KA3	Histone phosphorylation
RPS6KA4	Histone phosphorylation
RPS6KA5	Histone phosphorylation
STK4	Histone phosphorylation
TLK1	Histone phosphorylation
TLK2	Histone phosphorylation
TSSK6	Histone phosphorylation
TTK	Histone phosphorylation
VRK1	Histone phosphorylation
RUVBL1	Histone phosphorylation, Chromatin remodeling
SENP1	Histone sumoylation
SENP3	Histone sumoylation, Histone acetylation
ARID1B	Histone ubiquitination
BARD1	Histone ubiquitination
CUL3	Histone ubiquitination
CUL4A	Histone ubiquitination
CUL4B	Histone ubiquitination
DDB1	Histone ubiquitination
DDB2	Histone ubiquitination
DTX3L	Histone ubiquitination
DZIP3	Histone ubiquitination
ENY2	Histone ubiquitination
HUWE1	Histone ubiquitination
LEO1	Histone ubiquitination
MSL1	Histone ubiquitination
MSL2	Histone ubiquitination
MYSM1	Histone ubiquitination
PAF1	Histone ubiquitination
RAD51	Histone ubiquitination
RAG1	Histone ubiquitination
RBX1	Histone ubiquitination
RNF168	Histone ubiquitination
RNF2	Histone ubiquitination
RNF20	Histone ubiquitination
RNF40	Histone ubiquitination
RNF8	Histone ubiquitination
SHPRH	Histone ubiquitination
SKP1	Histone ubiquitination
SPOP	Histone ubiquitination
UBE2A	Histone ubiquitination
UBE2B	Histone ubiquitination
UBE2D1	Histone ubiquitination
UBE2D3	Histone ubiquitination
UBE2E1	Histone ubiquitination
UBE2H	Histone ubiquitination
UBE2N	Histone ubiquitination
UBE2T	Histone ubiquitination
UBR2	Histone ubiquitination
UCHL5	Histone ubiquitination
UHRF1	Histone ubiquitination
USP11	Histone ubiquitination
USP12	Histone ubiquitination
USP15	Histone ubiquitination
USP16	Histone ubiquitination
USP17L2	Histone ubiquitination
USP21	Histone ubiquitination
USP22	Histone ubiquitination
USP3	Histone ubiquitination
USP36	Histone ubiquitination
USP44	Histone ubiquitination
USP46	Histone ubiquitination
USP49	Histone ubiquitination
UTY	Histone ubiquitination
WAC	Histone ubiquitination
WSB2	Histone ubiquitination
RB1	Histone ubiquitination, Chromatin remodeling
UBR5	Histone ubiquitination, Chromatin remodeling
USP7	Histone ubiquitination, DNA methylation
RING1	Histone ubiquitination, Polycomb group (PcG) protein
SYNCRIP	mRNA editing
BCOR	Polycomb group (PcG) protein
BMI1	Polycomb group (PcG) protein
EED	Polycomb group (PcG) protein
EPC1	Polycomb group (PcG) protein
MBTD1	Polycomb group (PcG) protein
MTF2	Polycomb group (PcG) protein
PARP3	Polycomb group (PcG) protein
PCGF1	Polycomb group (PcG) protein
PCGF2	Polycomb group (PcG) protein
PCGF3	Polycomb group (PcG) protein
PCGF5	Polycomb group (PcG) protein
PCGF6	Polycomb group (PcG) protein
PHC1	Polycomb group (PcG) protein
PHC2	Polycomb group (PcG) protein
PHC3	Polycomb group (PcG) protein
PHF1	Polycomb group (PcG) protein
RYBP	Polycomb group (PcG) protein
SCMH1	Polycomb group (PcG) protein
SCML2	Polycomb group (PcG) protein
SCML4	Polycomb group (PcG) protein
SFMBT1	Polycomb group (PcG) protein
A1CF	RNA deamination
EXOSC1	RNA degradation
EXOSC2	RNA degradation
EXOSC3	RNA degradation
EXOSC4	RNA degradation
EXOSC5	RNA degradation
EXOSC6	RNA degradation
EXOSC7	RNA degradation
EXOSC8	RNA degradation
EXOSC9	RNA degradation
DDX21	RNA modification
DDX50	RNA modification
DND1	RNA modification
SF3B1	RNA modification
SF3B3	RNA modification
SRSF1	RNA modification
SRSF3	RNA modification
TDRKH	RNA modification
TYW5	RNA modification
ASXL3	Scaffold protein, Polycomb group (PcG) protein
FOXO1	TF
FOXP1	TF
FOXP2	TF
FOXP3	TF
FOXP4	TF
GTF2I	TF
IKZF3	TF
TAF2	TF
ZFP57	TF
ZGPAT	TF
SMARCA2	TF activator
SMARCA4	TF activator
CTCF	TF activator, Chromatin remodeling
NFYB	TF activator, Chromatin remodeling
NPAS2	TF activator, Chromatin remodeling
HINFP	TF activator, TF repressor
SP1	TF activator, TF repressor, Chromatin remodeling
E2F6	TF repressor
SFPQ	TF repressor
HDGF	TF repressor, Chromatin remodeling
NOC2L	TF repressor, Chromatin remodeling
YY1	TF repressor, Chromatin remodeling cofactor
SFMBT2	TF repressor, Polycomb group (PcG) protein
ANKRD32	0
BRE	0
C11orf30	0
C14orf169	0
CCDC101	0
CSRP2BP	0
FAM175A	0
FAM175B	0
GSG2	0
IKBKAP	0
MGEA5	0
MINA	0
MUM1	Histone modification read
SETD8	0
SMEK1	0
SMEK2	0
SUV420H1	0
SUV420H2	0
WHSC1	0
WHSC1L1	0
FBXO10	0
HSPBAP1	0
JMJD4	0
JMJD7	0
JMJD8	0
PRMT3	0
SETD4	0
SETD9	0
SIRT3	0
SIRT4	0
SIRT5	0
SMYD5	0
CENPA	Histone
H1F0	Histone
H1FNT	Histone
H1FOO	Histone
H1FX	Histone
H2AFB1	Histone
H2AFB2	Histone
H2AFB3	Histone
H2AFJ	Histone
H2AFV	Histone
H2AFX	Histone
H2AFY	Histone
H2AFY2	Histone
H2AFZ	Histone
H2BFM	Histone
H2BFS	Histone
H2BFWT	Histone
H3F3A	Histone
H3F3B	Histone
H3F3C	Histone
HIST1H1A	Histone
HIST1H1B	Histone
HIST1H1C	Histone
HIST1H1D	Histone
HIST1H1E	Histone
HIST1H1T	Histone
HIST1H2AA	Histone
HIST1H2AB	Histone
HIST1H2AC	Histone
HIST1H2AD	Histone
HIST1H2AE	Histone
HIST1H2AG	Histone
HIST1H2AH	Histone
HIST1H2AI	Histone
HIST1H2AJ	Histone
HIST1H2AK	Histone
HIST1H2AL	Histone
HIST1H2AM	Histone
HIST1H2BA	Histone
HIST1H2BB	Histone
HIST1H2BC	Histone
HIST1H2BD	Histone
HIST1H2BE	Histone
HIST1H2BF	Histone
HIST1H2BG	Histone
HIST1H2BH	Histone
HIST1H2BI	Histone
HIST1H2BJ	Histone
HIST1H2BK	Histone
HIST1H2BL	Histone
HIST1H2BM	Histone
HIST1H2BN	Histone
HIST1H2BO	Histone
HIST1H3A	Histone
HIST1H3B	Histone
HIST1H3C	Histone
HIST1H3D	Histone
HIST1H3E	Histone
HIST1H3F	Histone
HIST1H3G	Histone
HIST1H3H	Histone
HIST1H3I	Histone
HIST1H3J	Histone
HIST1H4A	Histone
HIST1H4B	Histone
HIST1H4C	Histone
HIST1H4D	Histone
HIST1H4E	Histone
HIST1H4F	Histone
HIST1H4G	Histone
HIST1H4H	Histone
HIST1H4I	Histone
HIST1H4J	Histone
HIST1H4K	Histone
HIST1H4L	Histone
HIST2H2AA3	Histone
HIST2H2AA4	Histone
HIST2H2AB	Histone
HIST2H2AC	Histone
HIST2H2BC	Histone
HIST2H2BD	Histone
HIST2H2BE	Histone
HIST2H2BF	Histone
HIST2H3A	Histone
HIST2H3C	Histone
HIST2H3D	Histone
HIST2H4A	Histone
HIST2H4B	Histone
HIST3H2A	Histone
HIST3H2BB	Histone
HIST3H3	Histone
HIST4H4	Histone
PRM1	Histone
PRM2	Histone
PRM3	Histone
ACTA1	0
AKAP1	0
ALKBH3	0
BAHCC1	0
BAG6	0
BTAF1	0
VCPKMT	0
RIOX1	0
CAMKMT	0
ATAT1	0
SGF29	Histone modification read
DHX30	0
DIDO1	0
DUSP1	0
FMR1	0
FTO	0
FXR1	0
FXR2	0
GABRG1	0
GLYATL1	0
GTF3C1	0
HDGFL1	0
HNF1A	0
IDH1	0
IDH2	0
INTS12	0
PHF24	0
KIAA2026	0
LMNA	0
LMNB1	0
LMNB2	0
MECOM	0
MGMT	0
RIOX2	Histone modification erase
NCOA4	0
NCOA5	0
NCOA7	0
ORC1	0
PHF11	0
PHF21B	0
PHF23	0
PHF3	0
PHF6	0
PHF7	0
PHRF1	0
PRDM10	0
PRDM15	0
PWWP2B	0
PYGO1	0
PYGO2	0
RERE	0
RNF17	0
RTF1	0
SETBP1	0
KMT5A	Histone modification write
SMC1A	0
SMCHD1	0
PPP4R3A	Histone modification erase cofactor
PPP4R3B	Histone modification erase cofactor
PPP4R3CP	0
SMN1	0
SMN2	0
SMNDC1	0
SND1	0
SP110	0
SP140L	0
STK31	0
KMT5B	Histone modification write
KMT5C	Histone modification write
TCF19	0
TCF20	0
TDRD10	0
TDRD12	0
TDRD1	0
TDRD5	0
TDRD6	0
TDRD9	0
TNRC18	0
TRDMT1	0
TRIM66	0
TTF2	0
NSD3	Chromatin remodelling cofactor
NSD2	Histone modification write
ZBTB38	0
ZBTB4	0
ZCWPW2	0
ZMYM1	0
ZMYM4	0
ZMYM5	0
ZMYM6	0
