# Supplementary material for: Prognostic Significance of Dysregulated Epigenomic and Chromatin Modifiers in Cervical Cancer
Source: Cells. 2021 Oct 5;10(10):2665. doi: 10.3390/cells10102665 (PMC8534148; doi:10.3390/cells10102665)
Supplement: Supplementary file 1 [file cells-10-02665-s001.zip › Supplementary Table_2.xlsx]

## Sheet: Sheet1
Table 2: Differentially expressed epigenetic and chromatin modifiers in Cancerous as compared to adjacent normal tissues.
Column1	Cancerous vs Normal	Column2
Function	Epigenome regulator	Expression value
Histone ubiquitination	UHRF1	2.05532
Chromatin remodeling	ATAD2	2.06822
Chromatin remodeling cofactor	PARP2	1.042
Chromatin remodeling	HELLS	1.62043
Histone phosphorylation	MASTL	1.36065
Histone phosphorylation	CDK2	1.246
Histone acetylation, Histone methylation, Histone ubiquitination, TF activator, TF repressor	BRCA1	1.09094
Histone modification read	MSH6	1.24698
Chromatin remodeling cofactor	HLTF	1.86
Transcription Factor	ACTL6A	1.2527
nucleic acid binding and helicase activity	AURKA	1.31819
Histone phosphorylation	CDK1	1.63217
Chromatin remodeling	CDC6	1.2239
nucleic acid binding and RNA binding	FXR1	1.44535
structural molecule activity and phospholipase binding	PSIP1	1.46403
Histone acetylation	TAF5	1.05858
Transcription Factor	TCF19	1.1061
Histone modification read	CBX3	1.36711
Histone methylation, Polycomb group (PcG) protein	EZH2	1.38628
Histone methylation, Histone ubiquitination, TF repressor	SUZ12	1.06782
Histone modification read	MDC1	1.10081
Transcription Factor	RMI1	1.3296
nucleic acid binding and helicase activity	PHC3	1.22871
Histone phosphorylation	CHEK1	1.54678
Histone modification read	PHIP	1.27677
Histone ubiquitination	DTX3L	1.00703
Histone deubiquitination, Polycomb group (PcG) protein	ASXL1	1.03368
Histone phosphorylation	BUB1	1.57074
Histone acetylation	TRIM16	-1.68643
Histone phosphorylation	VRK1	1.3731
Chromatin remodeling	DEK	1.0256
Histone ubiquitination	BARD1	1.23444
	HSPBAP1	1.21478
Histone ubiquitination	MSL2	1.52847
Histone phosphorylation	PAK2	1.16281
Histone phosphorylation	TTK	1.45579
DNA demethylation, mRNA editing	APOBEC3B	1.80474
Polycomb group (PcG) protein	MTF2	1.18199
Histone ubiquitination	RNF168	1.17606
Chromatin remodeling	NASP	1.02554
TF repressor, Polycomb group (PcG) protein	SFMBT2	1.37231
Histone ubiquitination	RAD51	1.13017
Histone methylation	SUV39H2	1.13335
Histone chaperone, Histone modification read	ANP32E	1.1295
Chromatin remodeling	TOP2A	1.44342
Histone ubiquitination	UBE2T	1.16534
Histone acetylation	HAT1	1.10254
structural molecule activity and phospholipase binding	LMNB1	1.42404
Chromatin remodeling	PCNA	1.00822
Histone phosphorylation	ATR	1.00244
Histone phosphorylation	PRKDC	1.27978
Histone modification cofactor	ZBTB7C	-1.25187
Histone citrullination	PADI1	-1.53941
Histone modification cofactor	NAP1L2	-1.17096
Histone chaperone	RBBP4	1.19968
RNA modification	SRSF3	1.10527
Histone phosphorylation	PBK	1.18785
Histone phosphorylation	STK4	1.23624
transcription regulatory region DNA binding and histone binding	TBL1XR1	1.23873
Histone modification read	CBX5	1.14588
Histone phosphorylation	EYA2	-1.09354
