# Supplementary material for: Prognostic Significance of Dysregulated Epigenomic and Chromatin Modifiers in Cervical Cancer
Source: Cells. 2021 Oct 5;10(10):2665. doi: 10.3390/cells10102665 (PMC8534148; doi:10.3390/cells10102665)
Supplement: Supplementary file 1 [file cells-10-02665-s001.zip › Supplementary Table_3.xlsx]

## Sheet: Sheet1
Table 3: Differentially expressed epigenetic and chromatin modifiers in invasive squamous cell carcinoma as compared to adjacent normal tissues.
Column1	SCC vs Normal	Column2
Function	Epigenome regulator	Expression value
Chromatin remodeling cofactor	ACTL6A	1.55247
Histone chaperone, Histone modification read	ANP32E	1.0236
DNA demethylation, mRNA editing	APOBEC3B	2.96882
Histone phosphorylation	ATR	1.10831
Chromatin remodeling	ATRX	1.02548
Histone phosphorylation	AURKA	2.28566
Histone modification read	CBX3	1.01503
Histone phosphorylation	CDK1	1.54274
Chromatin remodeling	DEK	1.2347
DNA methylation	DNMT1	1.02194
phosphatase activity and protein tyrosine/serine/threonine phosphatase activity	DUSP1	-1.7177
Histone methylation, Polycomb group (PcG) protein	EZH2	1.61437
nucleic acid binding and RNA binding.	FMR1	1.04489
nucleic acid binding and RNA binding.	FXR1	1.22802
Histone	H1-2	1.17861
Histone	H2BC12	1.00774
Chromatin remodeling cofactor	HLTF	2.02421
	HSPBAP1	1.45626
DNA modification	MBD4	1.41127
Chromatin remodeling	NASP	1.34637
Chromatin remodeling	PCNA	1.87143
chromatin binding	SMC1A	1.3907
Chromatin remodeling	TOP2A	2.46804
Histone phosphorylation	TTK	1.44604
Histone phosphorylation	VRK1	1.1485
