# Supplementary material for: Prognostic Significance of Dysregulated Epigenomic and Chromatin Modifiers in Cervical Cancer
Source: Cells. 2021 Oct 5;10(10):2665. doi: 10.3390/cells10102665 (PMC8534148; doi:10.3390/cells10102665)
Supplement: Supplementary file 1 [file cells-10-02665-s001.zip › Supplementary Table_4.xlsx]

## Sheet: Sheet1
Table 4: Differentially expressed epigenetic and chromatin modifiers as compared CIN -2/-3 against normal samples in cervical cancer.
Column1	CIN2 vs Normal	Column2		Column1	CIN3 vs Normal	Column2
Function	Epigenome regulator	Expression value		Function	Epigenome regulator	Expression value
DNA demethylation, mRNA editing	APOBEC3B	1.55374		Chromatin remodeling cofactor	ACTL6A	1.01162
Chromatin remodeling	ATAD2	1.35094		Histone chaperone, Histone modification read	ANP32E	1.33324
Histone phosphorylation	AURKA	1.06399		DNA demethylation, mRNA editing	APOBEC3B	2.14008
Chromatin remodeling	CDC6	1.06335		Chromatin remodeling	ATAD2	1.64552
Histone phosphorylation	CDK1	1.44187		Histone phosphorylation	AURKA	1.58535
Histone phosphorylation	CHEK1	1.55429		Histone ubiquitination	BARD1	1.25355
Chromatin remodeling	CTCFL	1.23455		Histone phosphorylation	BUB1	1.1988
Chromatin remodeling	HELLS	1.41767		Chromatin remodeling	CDC6	1.36991
Histone ubiquitination	RAD51	1.02836		Histone phosphorylation	CDK1	1.76691
Transcription Factor	TCF19	1.02286		Transcription Factor	CHEK1	1.5296
nucleic acid binding and helicase activity	TDRD9	1.81894		nucleic acid binding and helicase activity	CTCFL	1.30331
Chromatin remodeling	TOP2A	1.14854		Histone methylation, Polycomb group (PcG) protein	EZH2	1.26116
Histone phosphorylation	TTK	1.51245		Chromatin remodeling	HELLS	1.56165
Histone ubiquitination	UHRF1	1.48214		Chromatin remodeling cofactor	HLTF	1.33834
				structural molecule activity and phospholipase binding	LMNB1	1.30223
				Histone phosphorylation	MASTL	1.06605
				Histone modification cofactor	NAP1L2	-1.11299
				Chromatin remodeling	PCNA	1.03869
				Histone acetylation, Chromatin remodeling	PHF19	1.31472
				Histone ubiquitination	RAD51	1.27314
				DNA modification	RMI1	1.09672
				Transcription Factor	TCF19	1.1961
				nucleic acid binding and helicase activity	TDRD9	1.3876
				Chromatin remodeling	TOP2A	1.3314
				Histone phosphorylation	TTK	1.48542
				Histone ubiquitination	UBE2T	1.28978
				Histone ubiquitination	UHRF1	1.82014
				Histone phosphorylation	VRK1	1.1987
				Chromatin remodeling	ZNF541	1.00889
