# Supplementary material for: Prognostic Significance of Dysregulated Epigenomic and Chromatin Modifiers in Cervical Cancer
Source: Cells. 2021 Oct 5;10(10):2665. doi: 10.3390/cells10102665 (PMC8534148; doi:10.3390/cells10102665)
Supplement: Supplementary file 1 [file cells-10-02665-s001.zip › Supplementary Table_5.xlsx]

## Sheet: Sheet1
Table 5: List of 57 epigenetic and chromatin modifying genes.
HSPBAP1
PSIP1
FXR1
SMC1A
ATAD2
ZNF541
DEK
NASP
ATRX
HLTF
PARP2
ACTL6A
CTCFL
APOBEC3B
DNMT1
MBD4
RMI1
HIST1H1C
HIST1H2BK
TAF5
TRIM16
HAT1
PHF19
BRCA1
RBBP4
ANP32E
PADI1
ASXL1
SUV39H2
SUZ12
NAP1L2
ZBTB7C
MSH6
CBX3
MDC1
PHIP
CBX5
MASTL
CDK2
PAK2
ATR
PRKDC
STK4
CHEK1
BARD1
DTX3L
MSL2
RNF168
TDRD9
EYA2
PHC3
FMR1
DUSP1
MTF2
SRSF3
SFMBT2
TBL1XR1
