# Supplementary material for: Prognostic Significance of Dysregulated Epigenomic and Chromatin Modifiers in Cervical Cancer
Source: Cells. 2021 Oct 5;10(10):2665. doi: 10.3390/cells10102665 (PMC8534148; doi:10.3390/cells10102665)
Supplement: Supplementary file 1 [file cells-10-02665-s001.zip › Supplementary Table_6.xlsx]

## Sheet: Sheet1
Table 6: Test genes with fitness scores in cervical cancer cell lines
Source?	Gene	Model	Tissue	Cancer type	Corrected log fold change?	Loss of fitness score?	Essential gene
Broad	HSPBAP1	BOKU	Cervix	Cervical Carcinoma	-0.20671	2.039	No
Broad	HSPBAP1	HCA1	Cervix	Cervical Carcinoma	-0.00199	3.6885	No
Broad	HSPBAP1	SISO	Cervix	Cervical Carcinoma	0.0425	3.779	No
Broad	HSPBAP1	C-4-II	Cervix	Cervical Carcinoma	0.11561	4.6165	No
Broad	HSPBAP1	Ca-Ski	Cervix	Cervical Carcinoma	0.1501	4.167	No
Broad	HSPBAP1	HT-3	Cervix	Cervical Carcinoma	0.16181	3.41	No
Broad	HSPBAP1	C-33-A	Cervix	Cervical Carcinoma	0.17206	4.6765	No
Broad	HSPBAP1	SKG-II	Cervix	Cervical Carcinoma	0.18883	4.5795	No
Broad	HSPBAP1	HCS-2	Cervix	Cervical Carcinoma	0.19626	4.444	No
Broad	HSPBAP1	SKG-I	Cervix	Cervical Carcinoma	0.20982	5.256	No
Broad	HSPBAP1	DoTc2-4510	Cervix	Cervical Carcinoma	0.21706	4.663	No
Broad	HSPBAP1	SF767	Cervix	Cervical Carcinoma	0.23421	5.5575	No
Broad	HSPBAP1	SW756	Cervix	Cervical Carcinoma	0.36138	6.202	No
Broad	HSPBAP1	SiHa	Cervix	Cervical Carcinoma	NA	4.6235	No
Source?	Gene	Model	Tissue	Cancer type	Corrected log fold change?	Loss of fitness score?	Essential gene
Broad	PSIP1	SKG-I	Cervix	Cervical Carcinoma	-0.32825	2.004	No
Broad	PSIP1	SISO	Cervix	Cervical Carcinoma	-0.15834	1.905	No
Broad	PSIP1	C-33-A	Cervix	Cervical Carcinoma	-0.08581	2.7135	No
Broad	PSIP1	HT-3	Cervix	Cervical Carcinoma	-0.06595	2.127	No
Broad	PSIP1	C-4-II	Cervix	Cervical Carcinoma	-0.06342	3.3785	No
Broad	PSIP1	HCS-2	Cervix	Cervical Carcinoma	0.0052	3.166	No
Broad	PSIP1	SW756	Cervix	Cervical Carcinoma	0.04174	3.657	No
Broad	PSIP1	DoTc2-4510	Cervix	Cervical Carcinoma	0.16122	4.241	No
Broad	PSIP1	HCA1	Cervix	Cervical Carcinoma	0.18453	4.8765	No
Broad	PSIP1	Ca-Ski	Cervix	Cervical Carcinoma	0.29352	5.358	No
Broad	PSIP1	SKG-II	Cervix	Cervical Carcinoma	0.32552	5.5345	No
Broad	PSIP1	BOKU	Cervix	Cervical Carcinoma	0.43212	6.141	No
Broad	PSIP1	SF767	Cervix	Cervical Carcinoma	0.55238	8.0635	No
Broad	PSIP1	SiHa	Cervix	Cervical Carcinoma	NA	4.6635	No
Source?	Gene	Model	Tissue	Cancer type	Corrected log fold change?	Loss of fitness score?	Essential gene
Broad	FXR1	HT-3	Cervix	Cervical Carcinoma	-0.20782	1.163	No
Broad	FXR1	C-33-A	Cervix	Cervical Carcinoma	-0.1694	2.0835	No
Broad	FXR1	SiHa	Cervix	Cervical Carcinoma	0.03576	4.3875	No
Broad	FXR1	C-4-II	Cervix	Cervical Carcinoma	0.11349	4.5515	No
Broad	FXR1	HCS-2	Cervix	Cervical Carcinoma	0.15936	4.029	No
Broad	FXR1	SKG-II	Cervix	Cervical Carcinoma	0.16476	4.3315	No
Broad	FXR1	SISO	Cervix	Cervical Carcinoma	0.18874	5.199	No
Broad	FXR1	HCA1	Cervix	Cervical Carcinoma	0.19731	4.9555	No
Broad	FXR1	SKG-I	Cervix	Cervical Carcinoma	0.19916	5.192	No
Broad	FXR1	DoTc2-4510	Cervix	Cervical Carcinoma	0.23384	4.816	No
Broad	FXR1	SW756	Cervix	Cervical Carcinoma	0.24811	5.458	No
Broad	FXR1	BOKU	Cervix	Cervical Carcinoma	0.39968	5.653	No
Broad	FXR1	SF767	Cervix	Cervical Carcinoma	0.42186	7.0455	No
Broad	FXR1	Ca-Ski	Cervix	Cervical Carcinoma	0.43463	6.222	No
Source?	Gene	Model	Tissue	Cancer type	Corrected log fold change?	Loss of fitness score?	Essential gene
Broad	ATAD2	SISO	Cervix	Cervical Carcinoma	-0.3127	0.708	No
Broad	ATAD2	BOKU	Cervix	Cervical Carcinoma	-0.25955	1.824	No
Broad	ATAD2	C-4-II	Cervix	Cervical Carcinoma	-0.21156	2.1645	No
Broad	ATAD2	SKG-II	Cervix	Cervical Carcinoma	-0.03153	2.8205	No
Broad	ATAD2	HT-3	Cervix	Cervical Carcinoma	-0.02664	2.289	No
Broad	ATAD2	Ca-Ski	Cervix	Cervical Carcinoma	0.01158	3.141	No
Broad	ATAD2	SF767	Cervix	Cervical Carcinoma	0.01348	3.8705	No
Broad	ATAD2	DoTc2-4510	Cervix	Cervical Carcinoma	0.02803	3.374	No
Broad	ATAD2	SKG-I	Cervix	Cervical Carcinoma	0.03189	4.257	No
Broad	ATAD2	C-33-A	Cervix	Cervical Carcinoma	0.05154	3.7065	No
Broad	ATAD2	SW756	Cervix	Cervical Carcinoma	0.08191	4.13	No
Broad	ATAD2	HCA1	Cervix	Cervical Carcinoma	0.14714	4.4505	No
Broad	ATAD2	HCS-2	Cervix	Cervical Carcinoma	0.15343	4.286	No
Broad	ATAD2	SiHa	Cervix	Cervical Carcinoma	NA	NA	No
Source?	Gene	Model	Tissue	Cancer type	Corrected log fold change?	Loss of fitness score?	Essential gene
Broad	ZNF541	C-4-II	Cervix	Cervical Carcinoma	-0.14516	2.6575	No
Broad	ZNF541	HCA1	Cervix	Cervical Carcinoma	0.14197	4.5995	No
Broad	ZNF541	SISO	Cervix	Cervical Carcinoma	0.1534	4.879	No
Broad	ZNF541	DoTc2-4510	Cervix	Cervical Carcinoma	0.1598	4.37	No
Broad	ZNF541	SF767	Cervix	Cervical Carcinoma	0.20427	5.3135	No
Broad	ZNF541	SW756	Cervix	Cervical Carcinoma	0.23192	5.074	No
Broad	ZNF541	SKG-II	Cervix	Cervical Carcinoma	0.23211	5.1145	No
Broad	ZNF541	C-33-A	Cervix	Cervical Carcinoma	0.26124	5.2565	No
Broad	ZNF541	BOKU	Cervix	Cervical Carcinoma	0.26361	4.97	No
Broad	ZNF541	HT-3	Cervix	Cervical Carcinoma	0.27333	3.901	No
Broad	ZNF541	HCS-2	Cervix	Cervical Carcinoma	0.402	6.106	No
Broad	ZNF541	SKG-I	Cervix	Cervical Carcinoma	0.41781	6.651	No
Broad	ZNF541	SiHa	Cervix	Cervical Carcinoma	0.42069	6.7445	No
Broad	ZNF541	Ca-Ski	Cervix	Cervical Carcinoma	0.66096	8.389	No
Source?	Gene	Model	Tissue	Cancer type	Corrected log fold change?	Loss of fitness score?	Essential gene
Broad	DEK	BOKU	Cervix	Cervical Carcinoma	0.05228	3.682	No
Broad	DEK	SISO	Cervix	Cervical Carcinoma	0.05694	3.636	No
Broad	DEK	C-33-A	Cervix	Cervical Carcinoma	0.07611	3.9525	No
Broad	DEK	HCA1	Cervix	Cervical Carcinoma	0.2482	5.0625	No
Broad	DEK	SW756	Cervix	Cervical Carcinoma	0.36299	6.218	No
Broad	DEK	Ca-Ski	Cervix	Cervical Carcinoma	0.4273	6.357	No
Broad	DEK	SF767	Cervix	Cervical Carcinoma	0.44337	7.1705	No
Broad	DEK	DoTc2-4510	Cervix	Cervical Carcinoma	0.46992	6.449	No
Broad	DEK	SKG-I	Cervix	Cervical Carcinoma	0.58118	7.536	No
Broad	DEK	HCS-2	Cervix	Cervical Carcinoma	0.74797	8.571	No
Broad	DEK	SKG-II	Cervix	Cervical Carcinoma	0.81714	9.2585	No
Broad	DEK	C-4-II	Cervix	Cervical Carcinoma	0.81808	9.8195	No
Broad	DEK	HT-3	Cervix	Cervical Carcinoma	1.05152	8.702	No
Broad	DEK	SiHa	Cervix	Cervical Carcinoma	NA	5.5235	No
Source?	Gene	Model	Tissue	Cancer type	Corrected log fold change?	Loss of fitness score?	Essential gene
Broad	ATRX	SF767	Cervix	Cervical Carcinoma	-0.41397	0.2345	No
Broad	ATRX	BOKU	Cervix	Cervical Carcinoma	-0.32734	1.297	No
Broad	ATRX	C-33-A	Cervix	Cervical Carcinoma	-0.21986	1.7375	No
Broad	ATRX	HCA1	Cervix	Cervical Carcinoma	-0.08911	3.1695	No
Broad	ATRX	SW756	Cervix	Cervical Carcinoma	-0.07758	2.808	No
Broad	ATRX	Ca-Ski	Cervix	Cervical Carcinoma	0.02471	3.231	No
Broad	ATRX	SKG-II	Cervix	Cervical Carcinoma	0.04072	3.4805	No
Broad	ATRX	HT-3	Cervix	Cervical Carcinoma	0.0474	2.65	No
Broad	ATRX	HCS-2	Cervix	Cervical Carcinoma	0.09232	3.738	No
Broad	ATRX	C-4-II	Cervix	Cervical Carcinoma	0.21697	5.3545	No
Broad	ATRX	SISO	Cervix	Cervical Carcinoma	0.23804	5.21	No
Broad	ATRX	DoTc2-4510	Cervix	Cervical Carcinoma	0.25581	4.969	No
Broad	ATRX	SKG-I	Cervix	Cervical Carcinoma	0.26039	5.624	No
Broad	ATRX	SiHa	Cervix	Cervical Carcinoma	0.31293	6.0615	No
Source?	Gene	Model	Tissue	Cancer type	Corrected log fold change?	Loss of fitness score?	Essential gene
Broad	HLTF	HCA1	Cervix	Cervical Carcinoma	-0.32459	1.7315	No
Broad	HLTF	SF767	Cervix	Cervical Carcinoma	-0.20014	2.0325	No
Broad	HLTF	C-4-II	Cervix	Cervical Carcinoma	-0.15723	2.6515	No
Broad	HLTF	HCS-2	Cervix	Cervical Carcinoma	0.03025	3.479	No
Broad	HLTF	SKG-I	Cervix	Cervical Carcinoma	0.04743	4.295	No
Broad	HLTF	BOKU	Cervix	Cervical Carcinoma	0.16714	4.27	No
Broad	HLTF	SKG-II	Cervix	Cervical Carcinoma	0.16791	4.4735	No
Broad	HLTF	DoTc2-4510	Cervix	Cervical Carcinoma	0.20432	4.61	No
Broad	HLTF	Ca-Ski	Cervix	Cervical Carcinoma	0.21415	4.894	No
Broad	HLTF	HT-3	Cervix	Cervical Carcinoma	0.26875	3.881	No
Broad	HLTF	SISO	Cervix	Cervical Carcinoma	0.36535	5.97	No
Broad	HLTF	C-33-A	Cervix	Cervical Carcinoma	0.44093	6.4655	No
Broad	HLTF	SW756	Cervix	Cervical Carcinoma	0.49375	7.319	No
Broad	HLTF	SiHa	Cervix	Cervical Carcinoma	NA	4.9935	No
Source?	Gene	Model	Tissue	Cancer type	Corrected log fold change?	Loss of fitness score?	Essential gene
Broad	PARP2	Ca-Ski	Cervix	Cervical Carcinoma	-0.21469	1.525	No
Broad	PARP2	C-33-A	Cervix	Cervical Carcinoma	-0.02287	3.0895	No
Broad	PARP2	SKG-II	Cervix	Cervical Carcinoma	0.035	3.3095	No
Broad	PARP2	SISO	Cervix	Cervical Carcinoma	0.03776	3.82	No
Broad	PARP2	HCA1	Cervix	Cervical Carcinoma	0.04908	3.8965	No
Broad	PARP2	BOKU	Cervix	Cervical Carcinoma	0.11372	4.08	No
Broad	PARP2	DoTc2-4510	Cervix	Cervical Carcinoma	0.23989	4.777	No
Broad	PARP2	SKG-I	Cervix	Cervical Carcinoma	0.29807	5.749	No
Broad	PARP2	SW756	Cervix	Cervical Carcinoma	0.30622	5.454	No
Broad	PARP2	C-4-II	Cervix	Cervical Carcinoma	0.33193	5.9875	No
Broad	PARP2	SF767	Cervix	Cervical Carcinoma	0.35293	6.4385	No
Broad	PARP2	HCS-2	Cervix	Cervical Carcinoma	0.38702	6.046	No
Broad	PARP2	HT-3	Cervix	Cervical Carcinoma	0.41941	5.091	No
Broad	PARP2	SiHa	Cervix	Cervical Carcinoma	NA	4.5515	No
Source?	Gene	Model	Tissue	Cancer type	Corrected log fold change?	Loss of fitness score?	Essential gene
Broad	CTCFL	C-4-II	Cervix	Cervical Carcinoma	0.08746	4.3835	No
Broad	CTCFL	BOKU	Cervix	Cervical Carcinoma	0.18223	4.463	No
Broad	CTCFL	SISO	Cervix	Cervical Carcinoma	0.19763	4.73	No
Broad	CTCFL	HT-3	Cervix	Cervical Carcinoma	0.22022	3.791	No
Broad	CTCFL	SKG-I	Cervix	Cervical Carcinoma	0.23151	5.367	No
Broad	CTCFL	C-33-A	Cervix	Cervical Carcinoma	0.23949	5.0875	No
Broad	CTCFL	SF767	Cervix	Cervical Carcinoma	0.26053	5.7535	No
Broad	CTCFL	Ca-Ski	Cervix	Cervical Carcinoma	0.29441	5.522	No
Broad	CTCFL	HCS-2	Cervix	Cervical Carcinoma	0.31691	5.42	No
Broad	CTCFL	DoTc2-4510	Cervix	Cervical Carcinoma	0.37828	5.682	No
Broad	CTCFL	SKG-II	Cervix	Cervical Carcinoma	0.41545	6.2055	No
Broad	CTCFL	SW756	Cervix	Cervical Carcinoma	0.42148	6.768	No
Broad	CTCFL	HCA1	Cervix	Cervical Carcinoma	0.482	6.6825	No
Broad	CTCFL	SiHa	Cervix	Cervical Carcinoma	NA	5.4775	No
Source?	Gene	Model	Tissue	Cancer type	Corrected log fold change?	Loss of fitness score?	Essential gene
Broad	APOBEC3B	DoTc2-4510	Cervix	Cervical Carcinoma	-0.18684	1.9	No
Broad	APOBEC3B	BOKU	Cervix	Cervical Carcinoma	-0.06637	2.91	No
Broad	APOBEC3B	SKG-II	Cervix	Cervical Carcinoma	0.03516	3.4165	No
Broad	APOBEC3B	SISO	Cervix	Cervical Carcinoma	0.03931	3.463	No
Broad	APOBEC3B	HCA1	Cervix	Cervical Carcinoma	0.04437	3.9905	No
Broad	APOBEC3B	C-4-II	Cervix	Cervical Carcinoma	0.04726	4.1105	No
Broad	APOBEC3B	Ca-Ski	Cervix	Cervical Carcinoma	0.11141	3.87	No
Broad	APOBEC3B	C-33-A	Cervix	Cervical Carcinoma	0.11211	4.1565	No
Broad	APOBEC3B	SKG-I	Cervix	Cervical Carcinoma	0.16131	4.987	No
Broad	APOBEC3B	HCS-2	Cervix	Cervical Carcinoma	0.20177	4.671	No
Broad	APOBEC3B	HT-3	Cervix	Cervical Carcinoma	0.20952	3.725	No
Broad	APOBEC3B	SF767	Cervix	Cervical Carcinoma	0.25916	5.7425	No
Broad	APOBEC3B	SW756	Cervix	Cervical Carcinoma	0.28379	5.803	No
Broad	APOBEC3B	SiHa	Cervix	Cervical Carcinoma	0.3105	6.1865	No
Source?	Gene	Model	Tissue	Cancer type	Corrected log fold change?	Loss of fitness score?	Essential gene
Broad	MBD4	HCS-2	Cervix	Cervical Carcinoma	-0.42643	0.265	No
Broad	MBD4	SKG-I	Cervix	Cervical Carcinoma	-0.21838	2.689	No
Broad	MBD4	BOKU	Cervix	Cervical Carcinoma	-0.20225	2.07	No
Broad	MBD4	SISO	Cervix	Cervical Carcinoma	-0.04453	2.793	No
Broad	MBD4	DoTc2-4510	Cervix	Cervical Carcinoma	-0.02649	3.046	No
Broad	MBD4	SF767	Cervix	Cervical Carcinoma	-0.01819	3.4975	No
Broad	MBD4	C-33-A	Cervix	Cervical Carcinoma	-0.01247	3.2755	No
Broad	MBD4	SW756	Cervix	Cervical Carcinoma	-0.00222	3.468	No
Broad	MBD4	HT-3	Cervix	Cervical Carcinoma	0.02331	2.531	No
Broad	MBD4	HCA1	Cervix	Cervical Carcinoma	0.02885	3.7705	No
Broad	MBD4	C-4-II	Cervix	Cervical Carcinoma	0.08354	4.3055	No
Broad	MBD4	SKG-II	Cervix	Cervical Carcinoma	0.10361	3.8695	No
Broad	MBD4	Ca-Ski	Cervix	Cervical Carcinoma	0.27104	5.186	No
Broad	MBD4	SiHa	Cervix	Cervical Carcinoma	NA	3.6265	No
Source?	Gene	Model	Tissue	Cancer type	Corrected log fold change?	Loss of fitness score?	Essential gene
Broad	TRIM16	C-33-A	Cervix	Cervical Carcinoma	-0.00585	3.3395	No
Broad	TRIM16	SF767	Cervix	Cervical Carcinoma	0.09148	4.3975	No
Broad	TRIM16	HT-3	Cervix	Cervical Carcinoma	0.18731	3.562	No
Broad	TRIM16	BOKU	Cervix	Cervical Carcinoma	0.22786	4.729	No
Broad	TRIM16	HCS-2	Cervix	Cervical Carcinoma	0.24317	4.767	No
Broad	TRIM16	SKG-I	Cervix	Cervical Carcinoma	0.26409	5.682	No
Broad	TRIM16	SISO	Cervix	Cervical Carcinoma	0.2749	5.389	No
Broad	TRIM16	HCA1	Cervix	Cervical Carcinoma	0.28158	5.2545	No
Broad	TRIM16	DoTc2-4510	Cervix	Cervical Carcinoma	0.28433	5.164	No
Broad	TRIM16	C-4-II	Cervix	Cervical Carcinoma	0.2958	6.1415	No
Broad	TRIM16	SW756	Cervix	Cervical Carcinoma	0.33127	6.196	No
Broad	TRIM16	Ca-Ski	Cervix	Cervical Carcinoma	0.35745	5.821	No
Broad	TRIM16	SKG-II	Cervix	Cervical Carcinoma	0.38439	6.2025	No
Broad	TRIM16	SiHa	Cervix	Cervical Carcinoma	NA	5.8755	No
Source?	Gene	Model	Tissue	Cancer type	Corrected log fold change?	Loss of fitness score?	Essential gene
Broad	HAT1	SF767	Cervix	Cervical Carcinoma	-0.04897	3.2215	No
Broad	HAT1	Ca-Ski	Cervix	Cervical Carcinoma	-0.02879	2.831	No
Broad	HAT1	HCA1	Cervix	Cervical Carcinoma	-0.02541	3.5055	No
Broad	HAT1	SKG-II	Cervix	Cervical Carcinoma	0.03245	3.3945	No
Broad	HAT1	SW756	Cervix	Cervical Carcinoma	0.04759	3.649	No
Broad	HAT1	SISO	Cervix	Cervical Carcinoma	0.05618	3.886	No
Broad	HAT1	HT-3	Cervix	Cervical Carcinoma	0.07661	3.013	No
Broad	HAT1	HCS-2	Cervix	Cervical Carcinoma	0.16808	4.38	No
Broad	HAT1	DoTc2-4510	Cervix	Cervical Carcinoma	0.19334	4.447	No
Broad	HAT1	BOKU	Cervix	Cervical Carcinoma	0.23018	4.659	No
Broad	HAT1	C-4-II	Cervix	Cervical Carcinoma	0.24239	5.5335	No
Broad	HAT1	SKG-I	Cervix	Cervical Carcinoma	0.28724	5.774	No
Broad	HAT1	C-33-A	Cervix	Cervical Carcinoma	0.34548	5.7895	No
Broad	HAT1	SiHa	Cervix	Cervical Carcinoma	NA	3.9255	No
Source?	Gene	Model	Tissue	Cancer type	Corrected log fold change?	Loss of fitness score?	Essential gene
Broad	PHF19	SW756	Cervix	Cervical Carcinoma	-0.11352	2.509	No
Broad	PHF19	HCS-2	Cervix	Cervical Carcinoma	-0.08184	2.594	No
Broad	PHF19	HCA1	Cervix	Cervical Carcinoma	-0.01367	3.5825	No
Broad	PHF19	Ca-Ski	Cervix	Cervical Carcinoma	-0.00859	3.036	No
Broad	PHF19	HT-3	Cervix	Cervical Carcinoma	-0.00402	2.351	No
Broad	PHF19	BOKU	Cervix	Cervical Carcinoma	0.04382	3.589	No
Broad	PHF19	SKG-II	Cervix	Cervical Carcinoma	0.08254	3.8425	No
Broad	PHF19	DoTc2-4510	Cervix	Cervical Carcinoma	0.09612	3.898	No
Broad	PHF19	SKG-I	Cervix	Cervical Carcinoma	0.13048	4.814	No
Broad	PHF19	C-33-A	Cervix	Cervical Carcinoma	0.22208	5.0565	No
Broad	PHF19	C-4-II	Cervix	Cervical Carcinoma	0.25393	5.5245	No
Broad	PHF19	SF767	Cervix	Cervical Carcinoma	0.38808	6.7975	No
Broad	PHF19	SISO	Cervix	Cervical Carcinoma	0.52079	7.118	No
Broad	PHF19	SiHa	Cervix	Cervical Carcinoma	NA	4.6365	No
Source?	Gene	Model	Tissue	Cancer type	Corrected log fold change?	Loss of fitness score?	Essential gene
Broad	ANP32E	HCA1	Cervix	Cervical Carcinoma	-0.35736	1.5715	No
Broad	ANP32E	HCS-2	Cervix	Cervical Carcinoma	-0.32189	0.782	No
Broad	ANP32E	SKG-II	Cervix	Cervical Carcinoma	-0.28294	0.8695	No
Broad	ANP32E	SW756	Cervix	Cervical Carcinoma	-0.27004	1.216	No
Broad	ANP32E	HT-3	Cervix	Cervical Carcinoma	-0.257	1.507	No
Broad	ANP32E	DoTc2-4510	Cervix	Cervical Carcinoma	-0.23013	1.531	No
Broad	ANP32E	C-4-II	Cervix	Cervical Carcinoma	-0.07071	3.3115	No
Broad	ANP32E	SKG-I	Cervix	Cervical Carcinoma	-0.02957	3.902	No
Broad	ANP32E	SISO	Cervix	Cervical Carcinoma	0.05066	3.648	No
Broad	ANP32E	BOKU	Cervix	Cervical Carcinoma	0.09603	4.019	No
Broad	ANP32E	Ca-Ski	Cervix	Cervical Carcinoma	0.10987	3.859	No
Broad	ANP32E	SF767	Cervix	Cervical Carcinoma	0.15279	4.7995	No
Broad	ANP32E	C-33-A	Cervix	Cervical Carcinoma	0.25536	5.2125	No
Broad	ANP32E	SiHa	Cervix	Cervical Carcinoma	NA	NA	No
Source?	Gene	Model	Tissue	Cancer type	Corrected log fold change?	Loss of fitness score?	Essential gene
Broad	PADI1	SISO	Cervix	Cervical Carcinoma	0.14623	4.8	No
Broad	PADI1	SKG-II	Cervix	Cervical Carcinoma	0.15889	4.2585	No
Broad	PADI1	HT-3	Cervix	Cervical Carcinoma	0.15946	3.302	No
Broad	PADI1	BOKU	Cervix	Cervical Carcinoma	0.19605	4.613	No
Broad	PADI1	SKG-I	Cervix	Cervical Carcinoma	0.22726	5.407	No
Broad	PADI1	C-4-II	Cervix	Cervical Carcinoma	0.25811	5.7885	No
Broad	PADI1	SF767	Cervix	Cervical Carcinoma	0.28842	5.9975	No
Broad	PADI1	Ca-Ski	Cervix	Cervical Carcinoma	0.29381	5.442	No
Broad	PADI1	C-33-A	Cervix	Cervical Carcinoma	0.32089	5.7835	No
Broad	PADI1	SW756	Cervix	Cervical Carcinoma	0.34397	6.069	No
Broad	PADI1	HCS-2	Cervix	Cervical Carcinoma	0.35217	5.805	No
Broad	PADI1	HCA1	Cervix	Cervical Carcinoma	0.35407	5.6415	No
Broad	PADI1	DoTc2-4510	Cervix	Cervical Carcinoma	0.60378	7.449	No
Broad	PADI1	SiHa	Cervix	Cervical Carcinoma	NA	NA	No
Source?	Gene	Model	Tissue	Cancer type	Corrected log fold change?	Loss of fitness score?	Essential gene
Broad	ASXL1	C-33-A	Cervix	Cervical Carcinoma	-0.14241	2.2785	No
Broad	ASXL1	SF767	Cervix	Cervical Carcinoma	-0.00697	3.5295	No
Broad	ASXL1	SKG-II	Cervix	Cervical Carcinoma	-0.00044	3.0625	No
Broad	ASXL1	SISO	Cervix	Cervical Carcinoma	0.06696	3.784	No
Broad	ASXL1	HT-3	Cervix	Cervical Carcinoma	0.12534	3.178	No
Broad	ASXL1	HCA1	Cervix	Cervical Carcinoma	0.12752	4.5235	No
Broad	ASXL1	DoTc2-4510	Cervix	Cervical Carcinoma	0.18214	4.364	No
Broad	ASXL1	C-4-II	Cervix	Cervical Carcinoma	0.26216	5.7015	No
Broad	ASXL1	HCS-2	Cervix	Cervical Carcinoma	0.31456	5.199	No
Broad	ASXL1	SKG-I	Cervix	Cervical Carcinoma	0.40339	6.563	No
Broad	ASXL1	BOKU	Cervix	Cervical Carcinoma	0.43096	6.013	No
Broad	ASXL1	Ca-Ski	Cervix	Cervical Carcinoma	0.43664	6.407	No
Broad	ASXL1	SW756	Cervix	Cervical Carcinoma	0.56985	7.432	No
Broad	ASXL1	SiHa	Cervix	Cervical Carcinoma	NA	5.4695	No
Source?	Gene	Model	Tissue	Cancer type	Corrected log fold change?	Loss of fitness score?	Essential gene
Broad	SUV39H2	SISO	Cervix	Cervical Carcinoma	-0.29867	0.681	No
Broad	SUV39H2	SKG-I	Cervix	Cervical Carcinoma	-0.23276	2.589	No
Broad	SUV39H2	C-4-II	Cervix	Cervical Carcinoma	-0.20569	2.2505	No
Broad	SUV39H2	SKG-II	Cervix	Cervical Carcinoma	-0.18884	1.6605	No
Broad	SUV39H2	HCA1	Cervix	Cervical Carcinoma	-0.12652	2.8925	No
Broad	SUV39H2	SW756	Cervix	Cervical Carcinoma	-0.12468	2.495	No
Broad	SUV39H2	SF767	Cervix	Cervical Carcinoma	-0.11132	2.7115	No
Broad	SUV39H2	DoTc2-4510	Cervix	Cervical Carcinoma	-0.11125	2.383	No
Broad	SUV39H2	HT-3	Cervix	Cervical Carcinoma	-0.07562	1.975	No
Broad	SUV39H2	HCS-2	Cervix	Cervical Carcinoma	-0.01431	3.123	No
Broad	SUV39H2	BOKU	Cervix	Cervical Carcinoma	0.03665	3.543	No
Broad	SUV39H2	C-33-A	Cervix	Cervical Carcinoma	0.03848	3.6095	No
Broad	SUV39H2	Ca-Ski	Cervix	Cervical Carcinoma	0.10715	3.839	No
Broad	SUV39H2	SiHa	Cervix	Cervical Carcinoma	NA	3.3245	No
Source?	Gene	Model	Tissue	Cancer type	Corrected log fold change?	Loss of fitness score?	Essential gene
Broad	NAP1L2	Ca-Ski	Cervix	Cervical Carcinoma	-0.28243	1.016	No
Broad	NAP1L2	HT-3	Cervix	Cervical Carcinoma	-0.08812	1.833	No
Broad	NAP1L2	SKG-I	Cervix	Cervical Carcinoma	-0.06005	3.684	No
Broad	NAP1L2	C-4-II	Cervix	Cervical Carcinoma	0.00255	3.7545	No
Broad	NAP1L2	SiHa	Cervix	Cervical Carcinoma	0.03805	NA	No
Broad	NAP1L2	SISO	Cervix	Cervical Carcinoma	0.11966	4.154	No
Broad	NAP1L2	SKG-II	Cervix	Cervical Carcinoma	0.15232	4.2925	No
Broad	NAP1L2	HCS-2	Cervix	Cervical Carcinoma	0.20971	4.91	No
Broad	NAP1L2	BOKU	Cervix	Cervical Carcinoma	0.23414	4.753	No
Broad	NAP1L2	DoTc2-4510	Cervix	Cervical Carcinoma	0.3064	5.23	No
Broad	NAP1L2	SW756	Cervix	Cervical Carcinoma	0.31903	5.961	No
Broad	NAP1L2	SF767	Cervix	Cervical Carcinoma	0.37714	6.6865	No
Broad	NAP1L2	HCA1	Cervix	Cervical Carcinoma	0.63313	7.2825	No
Broad	NAP1L2	C-33-A	Cervix	Cervical Carcinoma	0.78339	9.9465	No
Source?	Gene	Model	Tissue	Cancer type	Corrected log fold change?	Loss of fitness score?	Essential gene
Broad	ZBTB7C	SISO	Cervix	Cervical Carcinoma	-0.08014	2.497	No
Broad	ZBTB7C	SW756	Cervix	Cervical Carcinoma	-0.07743	2.809	No
Broad	ZBTB7C	SiHa	Cervix	Cervical Carcinoma	-0.05563	3.8285	No
Broad	ZBTB7C	Ca-Ski	Cervix	Cervical Carcinoma	-0.04529	2.797	No
Broad	ZBTB7C	HCS-2	Cervix	Cervical Carcinoma	-0.02022	3.022	No
Broad	ZBTB7C	DoTc2-4510	Cervix	Cervical Carcinoma	0.03951	3.468	No
Broad	ZBTB7C	HT-3	Cervix	Cervical Carcinoma	0.05706	2.81	No
Broad	ZBTB7C	SF767	Cervix	Cervical Carcinoma	0.12778	4.6195	No
Broad	ZBTB7C	C-33-A	Cervix	Cervical Carcinoma	0.17682	4.6355	No
Broad	ZBTB7C	HCA1	Cervix	Cervical Carcinoma	0.22737	5.0555	No
Broad	ZBTB7C	SKG-II	Cervix	Cervical Carcinoma	0.2499	4.9395	No
Broad	ZBTB7C	SKG-I	Cervix	Cervical Carcinoma	0.25795	5.574	No
Broad	ZBTB7C	C-4-II	Cervix	Cervical Carcinoma	0.26401	5.5415	No
Broad	ZBTB7C	BOKU	Cervix	Cervical Carcinoma	0.4575	6.342	No
Source?	Gene	Model	Tissue	Cancer type	Corrected log fold change?	Loss of fitness score?	Essential gene
Broad	MSH6	SISO	Cervix	Cervical Carcinoma	-0.10197	2.567	No
Broad	MSH6	C-33-A	Cervix	Cervical Carcinoma	-0.06134	2.8745	No
Broad	MSH6	Ca-Ski	Cervix	Cervical Carcinoma	-0.00315	3.086	No
Broad	MSH6	BOKU	Cervix	Cervical Carcinoma	0.00785	3.366	No
Broad	MSH6	DoTc2-4510	Cervix	Cervical Carcinoma	0.07264	3.69	No
Broad	MSH6	HCS-2	Cervix	Cervical Carcinoma	0.15149	4.127	No
Broad	MSH6	HCA1	Cervix	Cervical Carcinoma	0.19713	4.8385	No
Broad	MSH6	C-4-II	Cervix	Cervical Carcinoma	0.22218	5.5175	No
Broad	MSH6	SW756	Cervix	Cervical Carcinoma	0.22313	5.126	No
Broad	MSH6	SF767	Cervix	Cervical Carcinoma	0.24378	5.7375	No
Broad	MSH6	SKG-II	Cervix	Cervical Carcinoma	0.3079	5.4365	No
Broad	MSH6	HT-3	Cervix	Cervical Carcinoma	0.3246	4.378	No
Broad	MSH6	SKG-I	Cervix	Cervical Carcinoma	0.34904	6.071	No
Broad	MSH6	SiHa	Cervix	Cervical Carcinoma	NA	5.0475	No
Source?	Gene	Model	Tissue	Cancer type	Corrected log fold change?	Loss of fitness score?	Essential gene
Broad	CBX3	HCA1	Cervix	Cervical Carcinoma	-0.45589	0.9295	No
Broad	CBX3	SKG-I	Cervix	Cervical Carcinoma	-0.22681	2.63	No
Broad	CBX3	Ca-Ski	Cervix	Cervical Carcinoma	-0.15108	1.952	No
Broad	CBX3	BOKU	Cervix	Cervical Carcinoma	-0.12554	2.531	No
Broad	CBX3	DoTc2-4510	Cervix	Cervical Carcinoma	-0.0837	2.557	No
Broad	CBX3	HT-3	Cervix	Cervical Carcinoma	-0.04894	2.222	No
Broad	CBX3	SF767	Cervix	Cervical Carcinoma	-0.02522	3.4485	No
Broad	CBX3	C-4-II	Cervix	Cervical Carcinoma	0.00679	3.8115	No
Broad	CBX3	C-33-A	Cervix	Cervical Carcinoma	0.10907	4.0975	No
Broad	CBX3	HCS-2	Cervix	Cervical Carcinoma	0.14945	3.965	No
Broad	CBX3	SW756	Cervix	Cervical Carcinoma	0.37258	6.161	No
Broad	CBX3	SISO	Cervix	Cervical Carcinoma	0.41848	6.714	No
Broad	CBX3	SKG-II	Cervix	Cervical Carcinoma	0.43939	6.6335	No
Broad	CBX3	SiHa	Cervix	Cervical Carcinoma	NA	4.1205	No
Source?	Gene	Model	Tissue	Cancer type	Corrected log fold change?	Loss of fitness score?	Essential gene
Broad	MDC1	SKG-II	Cervix	Cervical Carcinoma	-0.41434	-0.1635	Yes
Broad	MDC1	HT-3	Cervix	Cervical Carcinoma	-0.08718	1.94	No
Broad	MDC1	SISO	Cervix	Cervical Carcinoma	-0.07587	2.865	No
Broad	MDC1	HCA1	Cervix	Cervical Carcinoma	-0.07399	3.2765	No
Broad	MDC1	SW756	Cervix	Cervical Carcinoma	0.00893	3.35	No
Broad	MDC1	BOKU	Cervix	Cervical Carcinoma	0.02668	3.494	No
Broad	MDC1	Ca-Ski	Cervix	Cervical Carcinoma	0.04201	3.36	No
Broad	MDC1	DoTc2-4510	Cervix	Cervical Carcinoma	0.06968	3.689	No
Broad	MDC1	C-4-II	Cervix	Cervical Carcinoma	0.10221	4.4775	No
Broad	MDC1	SKG-I	Cervix	Cervical Carcinoma	0.11493	4.743	No
Broad	MDC1	HCS-2	Cervix	Cervical Carcinoma	0.13385	4.249	No
Broad	MDC1	C-33-A	Cervix	Cervical Carcinoma	0.17054	4.6585	No
Broad	MDC1	SF767	Cervix	Cervical Carcinoma	0.37258	6.6685	No
Broad	MDC1	SiHa	Cervix	Cervical Carcinoma	NA	4.8925	No
Source?	Gene	Model	Tissue	Cancer type	Corrected log fold change?	Loss of fitness score?	Essential gene
Broad	PHIP	C-33-A	Cervix	Cervical Carcinoma	-0.16834	2.0715	No
Broad	PHIP	HT-3	Cervix	Cervical Carcinoma	-0.16205	1.433	No
Broad	PHIP	DoTc2-4510	Cervix	Cervical Carcinoma	-0.12495	2.322	No
Broad	PHIP	SW756	Cervix	Cervical Carcinoma	-0.05552	2.968	No
Broad	PHIP	SISO	Cervix	Cervical Carcinoma	0.00444	3.234	No
Broad	PHIP	C-4-II	Cervix	Cervical Carcinoma	0.00887	3.9105	No
Broad	PHIP	HCA1	Cervix	Cervical Carcinoma	0.07921	4.1365	No
Broad	PHIP	Ca-Ski	Cervix	Cervical Carcinoma	0.10662	3.985	No
Broad	PHIP	HCS-2	Cervix	Cervical Carcinoma	0.11581	3.889	No
Broad	PHIP	SKG-II	Cervix	Cervical Carcinoma	0.11891	4.1485	No
Broad	PHIP	BOKU	Cervix	Cervical Carcinoma	0.18285	4.38	No
Broad	PHIP	SKG-I	Cervix	Cervical Carcinoma	0.18893	5.245	No
Broad	PHIP	SF767	Cervix	Cervical Carcinoma	0.3557	6.5325	No
Broad	PHIP	SiHa	Cervix	Cervical Carcinoma	NA	NA	No
Source?	Gene	Model	Tissue	Cancer type	Corrected log fold change?	Loss of fitness score?	Essential gene
Broad	CBX5	HT-3	Cervix	Cervical Carcinoma	-0.29094	0.748	No
Broad	CBX5	C-4-II	Cervix	Cervical Carcinoma	-0.27231	1.7435	No
Broad	CBX5	SISO	Cervix	Cervical Carcinoma	-0.26529	0.959	No
Broad	CBX5	SKG-II	Cervix	Cervical Carcinoma	-0.13476	2.0465	No
Broad	CBX5	C-33-A	Cervix	Cervical Carcinoma	-0.07292	2.8375	No
Broad	CBX5	SF767	Cervix	Cervical Carcinoma	-0.04933	3.1875	No
Broad	CBX5	DoTc2-4510	Cervix	Cervical Carcinoma	0.02918	3.34	No
Broad	CBX5	HCA1	Cervix	Cervical Carcinoma	0.03268	3.8585	No
Broad	CBX5	SKG-I	Cervix	Cervical Carcinoma	0.13474	4.825	No
Broad	CBX5	Ca-Ski	Cervix	Cervical Carcinoma	0.21733	4.764	No
Broad	CBX5	BOKU	Cervix	Cervical Carcinoma	0.22056	4.665	No
Broad	CBX5	HCS-2	Cervix	Cervical Carcinoma	0.28589	5.333	No
Broad	CBX5	SW756	Cervix	Cervical Carcinoma	0.33078	6.116	No
Broad	CBX5	SiHa	Cervix	Cervical Carcinoma	NA	NA	No
Source?	Gene	Model	Tissue	Cancer type	Corrected log fold change?	Loss of fitness score?	Essential gene
Broad	STK4	SKG-I	Cervix	Cervical Carcinoma	-0.18442	2.952	No
Broad	STK4	HCS-2	Cervix	Cervical Carcinoma	-0.12637	2.346	No
Broad	STK4	HCA1	Cervix	Cervical Carcinoma	-0.12325	2.9665	No
Broad	STK4	SISO	Cervix	Cervical Carcinoma	-0.08762	2.697	No
Broad	STK4	DoTc2-4510	Cervix	Cervical Carcinoma	-0.06671	2.676	No
Broad	STK4	SiHa	Cervix	Cervical Carcinoma	-0.05945	3.7945	No
Broad	STK4	SF767	Cervix	Cervical Carcinoma	-0.05816	3.0945	No
Broad	STK4	Ca-Ski	Cervix	Cervical Carcinoma	-0.02596	2.97	No
Broad	STK4	BOKU	Cervix	Cervical Carcinoma	-0.01854	3.202	No
Broad	STK4	HT-3	Cervix	Cervical Carcinoma	0.00746	3.214	No
Broad	STK4	SW756	Cervix	Cervical Carcinoma	0.06046	3.887	No
Broad	STK4	SKG-II	Cervix	Cervical Carcinoma	0.10529	3.9225	No
Broad	STK4	C-4-II	Cervix	Cervical Carcinoma	0.10606	4.5215	No
Broad	STK4	C-33-A	Cervix	Cervical Carcinoma	0.19285	5.0325	No
Source?	Gene	Model	Tissue	Cancer type	Corrected log fold change?	Loss of fitness score?	Essential gene
Broad	DTX3L	HCA1	Cervix	Cervical Carcinoma	-0.18329	2.4845	No
Broad	DTX3L	SISO	Cervix	Cervical Carcinoma	-0.15983	2.034	No
Broad	DTX3L	C-4-II	Cervix	Cervical Carcinoma	0.02408	3.9385	No
Broad	DTX3L	BOKU	Cervix	Cervical Carcinoma	0.11174	3.94	No
Broad	DTX3L	SKG-II	Cervix	Cervical Carcinoma	0.14908	4.3625	No
Broad	DTX3L	HCS-2	Cervix	Cervical Carcinoma	0.1614	4.043	No
Broad	DTX3L	SF767	Cervix	Cervical Carcinoma	0.18662	5.0765	No
Broad	DTX3L	Ca-Ski	Cervix	Cervical Carcinoma	0.21246	4.752	No
Broad	DTX3L	SW756	Cervix	Cervical Carcinoma	0.24174	5.269	No
Broad	DTX3L	C-33-A	Cervix	Cervical Carcinoma	0.29776	5.6105	No
Broad	DTX3L	DoTc2-4510	Cervix	Cervical Carcinoma	0.3003	5.301	No
Broad	DTX3L	SKG-I	Cervix	Cervical Carcinoma	0.30102	5.802	No
Broad	DTX3L	HT-3	Cervix	Cervical Carcinoma	0.32378	4.129	No
Broad	DTX3L	SiHa	Cervix	Cervical Carcinoma	NA	4.7255	No
Source?	Gene	Model	Tissue	Cancer type	Corrected log fold change?	Loss of fitness score?	Essential gene
Broad	MSL2	C-4-II	Cervix	Cervical Carcinoma	-0.20629	2.2305	No
Broad	MSL2	HT-3	Cervix	Cervical Carcinoma	-0.1268	2.063	No
Broad	MSL2	BOKU	Cervix	Cervical Carcinoma	-0.08179	2.818	No
Broad	MSL2	SF767	Cervix	Cervical Carcinoma	-0.05297	3.2585	No
Broad	MSL2	DoTc2-4510	Cervix	Cervical Carcinoma	-0.02299	3.065	No
Broad	MSL2	HCS-2	Cervix	Cervical Carcinoma	0.03329	3.438	No
Broad	MSL2	Ca-Ski	Cervix	Cervical Carcinoma	0.08188	3.749	No
Broad	MSL2	SKG-II	Cervix	Cervical Carcinoma	0.09152	3.8675	No
Broad	MSL2	SKG-I	Cervix	Cervical Carcinoma	0.11813	4.687	No
Broad	MSL2	SISO	Cervix	Cervical Carcinoma	0.15308	4.725	No
Broad	MSL2	SW756	Cervix	Cervical Carcinoma	0.28657	5.496	No
Broad	MSL2	HCA1	Cervix	Cervical Carcinoma	0.32965	5.5225	No
Broad	MSL2	C-33-A	Cervix	Cervical Carcinoma	0.35383	5.9295	No
Broad	MSL2	SiHa	Cervix	Cervical Carcinoma	NA	4.7795	No
Source?	Gene	Model	Tissue	Cancer type	Corrected log fold change?	Loss of fitness score?	Essential gene
Broad	TDRD9	SKG-II	Cervix	Cervical Carcinoma	0.15343	4.3745	No
Broad	TDRD9	DoTc2-4510	Cervix	Cervical Carcinoma	0.22849	4.777	No
Broad	TDRD9	HCA1	Cervix	Cervical Carcinoma	0.2504	5.1755	No
Broad	TDRD9	C-4-II	Cervix	Cervical Carcinoma	0.26388	5.6925	No
Broad	TDRD9	Ca-Ski	Cervix	Cervical Carcinoma	0.26632	5.302	No
Broad	TDRD9	HCS-2	Cervix	Cervical Carcinoma	0.27434	4.982	No
Broad	TDRD9	SISO	Cervix	Cervical Carcinoma	0.31797	6.136	No
Broad	TDRD9	SW756	Cervix	Cervical Carcinoma	0.37203	6.256	No
Broad	TDRD9	C-33-A	Cervix	Cervical Carcinoma	0.381	6.0565	No
Broad	TDRD9	SKG-I	Cervix	Cervical Carcinoma	0.3995	6.373	No
Broad	TDRD9	HT-3	Cervix	Cervical Carcinoma	0.40841	4.511	No
Broad	TDRD9	BOKU	Cervix	Cervical Carcinoma	0.41585	5.755	No
Broad	TDRD9	SF767	Cervix	Cervical Carcinoma	0.41889	6.9415	No
Broad	TDRD9	SiHa	Cervix	Cervical Carcinoma	NA	6.1705	No
Source?	Gene	Model	Tissue	Cancer type	Corrected log fold change?	Loss of fitness score?	Essential gene
Broad	EYA2	Ca-Ski	Cervix	Cervical Carcinoma	-0.11364	2.236	No
Broad	EYA2	HCA1	Cervix	Cervical Carcinoma	0.02006	3.8205	No
Broad	EYA2	SISO	Cervix	Cervical Carcinoma	0.05563	3.881	No
Broad	EYA2	HT-3	Cervix	Cervical Carcinoma	0.09019	3.033	No
Broad	EYA2	HCS-2	Cervix	Cervical Carcinoma	0.09376	3.869	No
Broad	EYA2	C-4-II	Cervix	Cervical Carcinoma	0.10201	4.4375	No
Broad	EYA2	SKG-II	Cervix	Cervical Carcinoma	0.11266	4.0405	No
Broad	EYA2	SF767	Cervix	Cervical Carcinoma	0.18858	5.0835	No
Broad	EYA2	BOKU	Cervix	Cervical Carcinoma	0.26262	4.838	No
Broad	EYA2	C-33-A	Cervix	Cervical Carcinoma	0.2964	5.5275	No
Broad	EYA2	DoTc2-4510	Cervix	Cervical Carcinoma	0.30211	5.174	No
Broad	EYA2	SKG-I	Cervix	Cervical Carcinoma	0.32361	5.938	No
Broad	EYA2	SW756	Cervix	Cervical Carcinoma	0.43293	6.764	No
Broad	EYA2	SiHa	Cervix	Cervical Carcinoma	NA	5.0065	No
Source?	Gene	Model	Tissue	Cancer type	Corrected log fold change?	Loss of fitness score?	Essential gene
Broad	PHC3	HT-3	Cervix	Cervical Carcinoma	0.09492	2.927	No
Broad	PHC3	HCS-2	Cervix	Cervical Carcinoma	0.10571	3.682	No
Broad	PHC3	C-33-A	Cervix	Cervical Carcinoma	0.10748	4.0845	No
Broad	PHC3	DoTc2-4510	Cervix	Cervical Carcinoma	0.13557	4.066	No
Broad	PHC3	Ca-Ski	Cervix	Cervical Carcinoma	0.16916	4.31	No
Broad	PHC3	SF767	Cervix	Cervical Carcinoma	0.26743	5.9225	No
Broad	PHC3	SW756	Cervix	Cervical Carcinoma	0.26934	5.487	No
Broad	PHC3	BOKU	Cervix	Cervical Carcinoma	0.27369	5.033	No
Broad	PHC3	C-4-II	Cervix	Cervical Carcinoma	0.27426	5.7915	No
Broad	PHC3	HCA1	Cervix	Cervical Carcinoma	0.37388	5.7805	No
Broad	PHC3	SKG-II	Cervix	Cervical Carcinoma	0.42516	6.2975	No
Broad	PHC3	SISO	Cervix	Cervical Carcinoma	0.49683	7.988	No
Broad	PHC3	SKG-I	Cervix	Cervical Carcinoma	0.57772	7.616	No
Broad	PHC3	SiHa	Cervix	Cervical Carcinoma	NA	5.7295	No
Source?	Gene	Model	Tissue	Cancer type	Corrected log fold change?	Loss of fitness score?	Essential gene
Broad	FMR1	SW756	Cervix	Cervical Carcinoma	-0.1902	1.899	No
Broad	FMR1	C-4-II	Cervix	Cervical Carcinoma	-0.11771	2.9605	No
Broad	FMR1	SF767	Cervix	Cervical Carcinoma	-0.10657	2.9005	No
Broad	FMR1	HCS-2	Cervix	Cervical Carcinoma	-0.08725	2.431	No
Broad	FMR1	SISO	Cervix	Cervical Carcinoma	-0.06574	2.895	No
Broad	FMR1	HT-3	Cervix	Cervical Carcinoma	-0.04085	2.28	No
Broad	FMR1	C-33-A	Cervix	Cervical Carcinoma	-0.02776	3.1325	No
Broad	FMR1	BOKU	Cervix	Cervical Carcinoma	0.04862	3.618	No
Broad	FMR1	SiHa	Cervix	Cervical Carcinoma	0.15449	5.1955	No
Broad	FMR1	SKG-II	Cervix	Cervical Carcinoma	0.15822	4.4135	No
Broad	FMR1	Ca-Ski	Cervix	Cervical Carcinoma	0.18581	4.383	No
Broad	FMR1	HCA1	Cervix	Cervical Carcinoma	0.24693	5.1345	No
Broad	FMR1	SKG-I	Cervix	Cervical Carcinoma	0.31418	5.972	No
Broad	FMR1	DoTc2-4510	Cervix	Cervical Carcinoma	0.40717	6.03	No
Source?	Gene	Model	Tissue	Cancer type	Corrected log fold change?	Loss of fitness score?	Essential gene
Broad	DUSP1	HT-3	Cervix	Cervical Carcinoma	-0.3831	0.175	No
Broad	DUSP1	SISO	Cervix	Cervical Carcinoma	-0.27337	0.947	No
Broad	DUSP1	HCA1	Cervix	Cervical Carcinoma	-0.22253	2.3475	No
Broad	DUSP1	SKG-I	Cervix	Cervical Carcinoma	-0.20159	2.79	No
Broad	DUSP1	SW756	Cervix	Cervical Carcinoma	-0.03841	2.868	No
Broad	DUSP1	BOKU	Cervix	Cervical Carcinoma	-0.02109	3.196	No
Broad	DUSP1	SF767	Cervix	Cervical Carcinoma	0.02348	3.7525	No
Broad	DUSP1	DoTc2-4510	Cervix	Cervical Carcinoma	0.03648	3.447	No
Broad	DUSP1	HCS-2	Cervix	Cervical Carcinoma	0.05364	3.344	No
Broad	DUSP1	C-33-A	Cervix	Cervical Carcinoma	0.25361	5.2955	No
Broad	DUSP1	C-4-II	Cervix	Cervical Carcinoma	0.27107	5.7675	No
Broad	DUSP1	SKG-II	Cervix	Cervical Carcinoma	0.27275	5.1125	No
Broad	DUSP1	Ca-Ski	Cervix	Cervical Carcinoma	0.30863	5.448	No
Broad	DUSP1	SiHa	Cervix	Cervical Carcinoma	0.45693	7.1165	No
Source?	Gene	Model	Tissue	Cancer type	Corrected log fold change?	Loss of fitness score?	Essential gene
Broad	MTF2	SW756	Cervix	Cervical Carcinoma	-0.29671	1.058	No
Broad	MTF2	SKG-II	Cervix	Cervical Carcinoma	-0.21746	1.4195	No
Broad	MTF2	HCA1	Cervix	Cervical Carcinoma	-0.20726	2.4305	No
Broad	MTF2	HT-3	Cervix	Cervical Carcinoma	-0.09896	2.302	No
Broad	MTF2	HCS-2	Cervix	Cervical Carcinoma	-0.02896	3.072	No
Broad	MTF2	Ca-Ski	Cervix	Cervical Carcinoma	0.02538	3.295	No
Broad	MTF2	DoTc2-4510	Cervix	Cervical Carcinoma	0.04273	3.49	No
Broad	MTF2	C-4-II	Cervix	Cervical Carcinoma	0.0891	4.4155	No
Broad	MTF2	BOKU	Cervix	Cervical Carcinoma	0.10649	3.909	No
Broad	MTF2	SKG-I	Cervix	Cervical Carcinoma	0.14263	4.782	No
Broad	MTF2	C-33-A	Cervix	Cervical Carcinoma	0.15022	4.3685	No
Broad	MTF2	SISO	Cervix	Cervical Carcinoma	0.15281	4.433	No
Broad	MTF2	SF767	Cervix	Cervical Carcinoma	0.16803	4.9245	No
Broad	MTF2	SiHa	Cervix	Cervical Carcinoma	NA	4.3745	No
Source?	Gene	Model	Tissue	Cancer type	Corrected log fold change?	Loss of fitness score?	Essential gene
Broad	SFMBT2	HT-3	Cervix	Cervical Carcinoma	-0.09763	2.313	No
Broad	SFMBT2	SKG-I	Cervix	Cervical Carcinoma	-0.09483	3.487	No
Broad	SFMBT2	C-4-II	Cervix	Cervical Carcinoma	-0.06373	3.2515	No
Broad	SFMBT2	SISO	Cervix	Cervical Carcinoma	-0.01775	3.058	No
Broad	SFMBT2	SKG-II	Cervix	Cervical Carcinoma	0.01358	3.1595	No
Broad	SFMBT2	HCS-2	Cervix	Cervical Carcinoma	0.05364	3.678	No
Broad	SFMBT2	DoTc2-4510	Cervix	Cervical Carcinoma	0.05822	3.61	No
Broad	SFMBT2	BOKU	Cervix	Cervical Carcinoma	0.09818	3.881	No
Broad	SFMBT2	SF767	Cervix	Cervical Carcinoma	0.16738	5.0935	No
Broad	SFMBT2	Ca-Ski	Cervix	Cervical Carcinoma	0.19418	4.667	No
Broad	SFMBT2	SW756	Cervix	Cervical Carcinoma	0.20421	4.936	No
Broad	SFMBT2	C-33-A	Cervix	Cervical Carcinoma	0.3143	5.6385	No
Broad	SFMBT2	HCA1	Cervix	Cervical Carcinoma	0.40844	5.9545	No
Broad	SFMBT2	SiHa	Cervix	Cervical Carcinoma	NA	5.0665	No
Source?	Gene	Model	Tissue	Cancer type	Corrected log fold change?	Loss of fitness score?	Essential gene
Broad	HIST1H2BK	SKG-I	Cervix	Cervical Carcinoma	-0.7873	-0.745	Yes
Broad	HIST1H2BK	SiHa	Cervix	Cervical Carcinoma	-0.5353	0.7935	No
Broad	HIST1H2BK	HT-3	Cervix	Cervical Carcinoma	-0.51584	-0.639	Yes
Broad	HIST1H2BK	HCS-2	Cervix	Cervical Carcinoma	-0.47691	-0.003	Yes
Broad	HIST1H2BK	HCA1	Cervix	Cervical Carcinoma	-0.37896	1.3645	No
Broad	HIST1H2BK	SF767	Cervix	Cervical Carcinoma	-0.32776	1.0325	No
Broad	HIST1H2BK	SKG-II	Cervix	Cervical Carcinoma	-0.31395	0.5455	No
Broad	HIST1H2BK	Ca-Ski	Cervix	Cervical Carcinoma	-0.30832	0.73	No
Broad	HIST1H2BK	DoTc2-4510	Cervix	Cervical Carcinoma	-0.25337	1.439	No
Broad	HIST1H2BK	SW756	Cervix	Cervical Carcinoma	-0.21395	1.628	No
Broad	HIST1H2BK	C-33-A	Cervix	Cervical Carcinoma	-0.19187	1.9065	No
Broad	HIST1H2BK	SISO	Cervix	Cervical Carcinoma	-0.18824	1.785	No
Broad	HIST1H2BK	BOKU	Cervix	Cervical Carcinoma	0.03656	3.517	No
Broad	HIST1H2BK	C-4-II	Cervix	Cervical Carcinoma	0.2384	5.6085	No
Source?	Gene	Model	Tissue	Cancer type	Corrected log fold change?	Loss of fitness score?	Essential gene
Broad	ACTL6A	Ca-Ski	Cervix	Cervical Carcinoma	-2.1601	-13.434	Yes
Broad	ACTL6A	HCS-2	Cervix	Cervical Carcinoma	-1.89463	-10.204	Yes
Broad	ACTL6A	HT-3	Cervix	Cervical Carcinoma	-1.87112	-8.504	Yes
Broad	ACTL6A	DoTc2-4510	Cervix	Cervical Carcinoma	-1.78398	-9.351	Yes
Broad	ACTL6A	C-4-II	Cervix	Cervical Carcinoma	-1.62997	-8.6715	Yes
Broad	ACTL6A	C-33-A	Cervix	Cervical Carcinoma	-1.55653	-7.8765	Yes
Broad	ACTL6A	BOKU	Cervix	Cervical Carcinoma	-1.53437	-5.972	Yes
Broad	ACTL6A	SISO	Cervix	Cervical Carcinoma	-1.43824	-8.787	Yes
Broad	ACTL6A	HCA1	Cervix	Cervical Carcinoma	-1.40997	-4.6475	Yes
Broad	ACTL6A	SKG-II	Cervix	Cervical Carcinoma	-1.39976	-7.7495	Yes
Broad	ACTL6A	SKG-I	Cervix	Cervical Carcinoma	-1.38725	-4.733	Yes
Broad	ACTL6A	SW756	Cervix	Cervical Carcinoma	-1.10818	-5.268	Yes
Broad	ACTL6A	SF767	Cervix	Cervical Carcinoma	-1.00587	-4.6655	Yes
Broad	ACTL6A	SiHa	Cervix	Cervical Carcinoma	NA	NA	No
Source?	Gene	Model	Tissue	Cancer type	Corrected log fold change?	Loss of fitness score?	Essential gene
Broad	SRSF3	C-4-II	Cervix	Cervical Carcinoma	-4.15532	-26.6235	Yes
Broad	SRSF3	HCA1	Cervix	Cervical Carcinoma	-3.62563	-17.9235	Yes
Broad	SRSF3	Ca-Ski	Cervix	Cervical Carcinoma	-3.44396	-22.669	Yes
Broad	SRSF3	SKG-I	Cervix	Cervical Carcinoma	-3.35845	-16.513	Yes
Broad	SRSF3	DoTc2-4510	Cervix	Cervical Carcinoma	-3.30957	-20.403	Yes
Broad	SRSF3	SF767	Cervix	Cervical Carcinoma	-3.09703	-21.7485	Yes
Broad	SRSF3	SW756	Cervix	Cervical Carcinoma	-2.92812	-19.794	Yes
Broad	SRSF3	HCS-2	Cervix	Cervical Carcinoma	-2.88662	-17.271	Yes
Broad	SRSF3	C-33-A	Cervix	Cervical Carcinoma	-2.58416	-15.2425	Yes
Broad	SRSF3	SKG-II	Cervix	Cervical Carcinoma	-2.51324	-17.4715	Yes
Broad	SRSF3	BOKU	Cervix	Cervical Carcinoma	-2.14795	-10.561	Yes
Broad	SRSF3	SISO	Cervix	Cervical Carcinoma	-2.07456	-13.325	Yes
Broad	SRSF3	HT-3	Cervix	Cervical Carcinoma	-1.68753	-8.319	Yes
Broad	SRSF3	SiHa	Cervix	Cervical Carcinoma	NA	-11.7765	Yes
Source?	Gene	Model	Tissue	Cancer type	Corrected log fold change?	Loss of fitness score?	Essential gene
Broad	CHEK1	SKG-I	Cervix	Cervical Carcinoma	-2.84755	-13.816	Yes
Broad	CHEK1	SISO	Cervix	Cervical Carcinoma	-2.49911	-15.201	Yes
Broad	CHEK1	HCA1	Cervix	Cervical Carcinoma	-2.48059	-11.3615	Yes
Broad	CHEK1	DoTc2-4510	Cervix	Cervical Carcinoma	-2.32386	-12.903	Yes
Broad	CHEK1	SW756	Cervix	Cervical Carcinoma	-2.25748	-14.436	Yes
Broad	CHEK1	C-4-II	Cervix	Cervical Carcinoma	-2.25526	-13.1455	Yes
Broad	CHEK1	Ca-Ski	Cervix	Cervical Carcinoma	-2.17606	-13.782	Yes
Broad	CHEK1	SKG-II	Cervix	Cervical Carcinoma	-2.15591	-14.5445	Yes
Broad	CHEK1	C-33-A	Cervix	Cervical Carcinoma	-2.03513	-11.6465	Yes
Broad	CHEK1	BOKU	Cervix	Cervical Carcinoma	-2.0184	-9.573	Yes
Broad	CHEK1	SF767	Cervix	Cervical Carcinoma	-1.99783	-12.3625	Yes
Broad	CHEK1	HT-3	Cervix	Cervical Carcinoma	-1.87086	-8.679	Yes
Broad	CHEK1	HCS-2	Cervix	Cervical Carcinoma	-1.85255	-9.878	Yes
Broad	CHEK1	SiHa	Cervix	Cervical Carcinoma	NA	-7.2085	Yes
Source?	Gene	Model	Tissue	Cancer type	Corrected log fold change?	Loss of fitness score?	Essential gene
Broad	MASTL	SISO	Cervix	Cervical Carcinoma	-2.37891	-16.933	Yes
Broad	MASTL	SF767	Cervix	Cervical Carcinoma	-1.94451	-12.3335	Yes
Broad	MASTL	C-4-II	Cervix	Cervical Carcinoma	-1.88713	-10.0155	Yes
Broad	MASTL	BOKU	Cervix	Cervical Carcinoma	-1.75755	-7.623	Yes
Broad	MASTL	C-33-A	Cervix	Cervical Carcinoma	-1.6873	-9.4735	Yes
Broad	MASTL	SKG-II	Cervix	Cervical Carcinoma	-1.6494	-10.9465	Yes
Broad	MASTL	HCS-2	Cervix	Cervical Carcinoma	-1.64205	-8.167	Yes
Broad	MASTL	HT-3	Cervix	Cervical Carcinoma	-1.63195	-7.476	Yes
Broad	MASTL	SW756	Cervix	Cervical Carcinoma	-1.60722	-9.322	Yes
Broad	MASTL	SKG-I	Cervix	Cervical Carcinoma	-1.38809	-4.422	Yes
Broad	MASTL	HCA1	Cervix	Cervical Carcinoma	-1.37928	-4.6935	Yes
Broad	MASTL	Ca-Ski	Cervix	Cervical Carcinoma	-1.29744	-6.647	Yes
Broad	MASTL	DoTc2-4510	Cervix	Cervical Carcinoma	-1.28466	-5.42	Yes
Broad	MASTL	SiHa	Cervix	Cervical Carcinoma	-1.86659	NA	No
Source?	Gene	Model	Tissue	Cancer type	Corrected log fold change?	Loss of fitness score?	Essential gene
Broad	SMC1A	HCA1	Cervix	Cervical Carcinoma	-1.80618	-6.7855	Yes
Broad	SMC1A	SKG-I	Cervix	Cervical Carcinoma	-1.75705	-6.711	Yes
Broad	SMC1A	DoTc2-4510	Cervix	Cervical Carcinoma	-1.62351	-7.682	Yes
Broad	SMC1A	HT-3	Cervix	Cervical Carcinoma	-1.58387	-7.182	Yes
Broad	SMC1A	HCS-2	Cervix	Cervical Carcinoma	-1.52309	-7.556	Yes
Broad	SMC1A	C-4-II	Cervix	Cervical Carcinoma	-1.41341	-6.8035	Yes
Broad	SMC1A	C-33-A	Cervix	Cervical Carcinoma	-1.39245	-7.2045	Yes
Broad	SMC1A	SKG-II	Cervix	Cervical Carcinoma	-1.27344	-6.9205	Yes
Broad	SMC1A	Ca-Ski	Cervix	Cervical Carcinoma	-1.02659	-4.51	Yes
Broad	SMC1A	SW756	Cervix	Cervical Carcinoma	-0.94703	-3.949	Yes
Broad	SMC1A	SF767	Cervix	Cervical Carcinoma	-0.78328	-2.8475	Yes
Broad	SMC1A	SISO	Cervix	Cervical Carcinoma	-0.64235	-2.277	Yes
Broad	SMC1A	BOKU	Cervix	Cervical Carcinoma	-0.60908	-0.348	Yes
Broad	SMC1A	SiHa	Cervix	Cervical Carcinoma	-1.19525	NA	No
Source?	Gene	Model	Tissue	Cancer type	Corrected log fold change?	Loss of fitness score?	Essential gene
Broad	ATR	SF767	Cervix	Cervical Carcinoma	-2.17788	-13.9995	Yes
Broad	ATR	HCA1	Cervix	Cervical Carcinoma	-1.97584	-8.4365	Yes
Broad	ATR	SKG-I	Cervix	Cervical Carcinoma	-1.52854	-5.291	Yes
Broad	ATR	DoTc2-4510	Cervix	Cervical Carcinoma	-1.48721	-7.188	Yes
Broad	ATR	BOKU	Cervix	Cervical Carcinoma	-1.44742	-5.445	Yes
Broad	ATR	Ca-Ski	Cervix	Cervical Carcinoma	-1.26981	-6.398	Yes
Broad	ATR	HT-3	Cervix	Cervical Carcinoma	-1.22096	-2.845	Yes
Broad	ATR	C-4-II	Cervix	Cervical Carcinoma	-1.20827	-5.2585	Yes
Broad	ATR	C-33-A	Cervix	Cervical Carcinoma	-1.13251	-4.9875	Yes
Broad	ATR	HCS-2	Cervix	Cervical Carcinoma	-0.97207	-4.046	Yes
Broad	ATR	SKG-II	Cervix	Cervical Carcinoma	-0.81911	-3.1795	Yes
Broad	ATR	SiHa	Cervix	Cervical Carcinoma	-0.80442	-0.9595	Yes
Broad	ATR	SISO	Cervix	Cervical Carcinoma	-0.60781	-2.014	Yes
Broad	ATR	SW756	Cervix	Cervical Carcinoma	-0.55417	-0.92	Yes
Source?	Gene	Model	Tissue	Cancer type	Corrected log fold change?	Loss of fitness score?	Essential gene
Broad	RBBP4	C-4-II	Cervix	Cervical Carcinoma	-2.76511	-16.9855	Yes
Broad	RBBP4	SISO	Cervix	Cervical Carcinoma	-2.31457	-16.068	Yes
Broad	RBBP4	SF767	Cervix	Cervical Carcinoma	-2.12801	-14.0285	Yes
Broad	RBBP4	C-33-A	Cervix	Cervical Carcinoma	-1.44052	-8.5615	Yes
Broad	RBBP4	SKG-II	Cervix	Cervical Carcinoma	-1.20189	-6.1055	Yes
Broad	RBBP4	Ca-Ski	Cervix	Cervical Carcinoma	-1.18199	-5.738	Yes
Broad	RBBP4	HCS-2	Cervix	Cervical Carcinoma	-1.13544	-4.733	Yes
Broad	RBBP4	SKG-I	Cervix	Cervical Carcinoma	-1.08481	-2.63	Yes
Broad	RBBP4	HCA1	Cervix	Cervical Carcinoma	-1.05609	-2.7785	Yes
Broad	RBBP4	DoTc2-4510	Cervix	Cervical Carcinoma	-1.04238	-3.965	Yes
Broad	RBBP4	SW756	Cervix	Cervical Carcinoma	-0.82966	-3.11	Yes
Broad	RBBP4	HT-3	Cervix	Cervical Carcinoma	-0.74545	-3.241	Yes
Broad	RBBP4	SiHa	Cervix	Cervical Carcinoma	NA	-2.4615	Yes
Broad	RBBP4	BOKU	Cervix	Cervical Carcinoma	-0.53181	0.063	No
Source?	Gene	Model	Tissue	Cancer type	Corrected log fold change?	Loss of fitness score?	Essential gene
Broad	DNMT1	HCA1	Cervix	Cervical Carcinoma	-1.40833	-4.9455	Yes
Broad	DNMT1	SF767	Cervix	Cervical Carcinoma	-0.90275	-3.7655	Yes
Broad	DNMT1	C-4-II	Cervix	Cervical Carcinoma	-0.83077	-2.2805	Yes
Broad	DNMT1	C-33-A	Cervix	Cervical Carcinoma	-0.78636	-2.4435	Yes
Broad	DNMT1	Ca-Ski	Cervix	Cervical Carcinoma	-0.72808	-2.33	Yes
Broad	DNMT1	SISO	Cervix	Cervical Carcinoma	-0.72007	-2.777	Yes
Broad	DNMT1	BOKU	Cervix	Cervical Carcinoma	-0.71591	-1.118	Yes
Broad	DNMT1	HT-3	Cervix	Cervical Carcinoma	-0.69488	-2.254	Yes
Broad	DNMT1	DoTc2-4510	Cervix	Cervical Carcinoma	-0.42077	0.291	No
Broad	DNMT1	HCS-2	Cervix	Cervical Carcinoma	-0.39225	0.553	No
Broad	DNMT1	SW756	Cervix	Cervical Carcinoma	-0.35658	0.481	No
Broad	DNMT1	SKG-I	Cervix	Cervical Carcinoma	-0.1529	3.111	No
Broad	DNMT1	SKG-II	Cervix	Cervical Carcinoma	0.18114	4.6015	No
Broad	DNMT1	SiHa	Cervix	Cervical Carcinoma	NA	1.5355	No
Source?	Gene	Model	Tissue	Cancer type	Corrected log fold change?	Loss of fitness score?	Essential gene
Broad	BARD1	HCA1	Cervix	Cervical Carcinoma	-1.11629	-3.1005	Yes
Broad	BARD1	C-4-II	Cervix	Cervical Carcinoma	-0.97968	-3.5365	Yes
Broad	BARD1	HCS-2	Cervix	Cervical Carcinoma	-0.82898	-2.983	Yes
Broad	BARD1	HT-3	Cervix	Cervical Carcinoma	-0.79611	-2.287	Yes
Broad	BARD1	SKG-I	Cervix	Cervical Carcinoma	-0.76989	-0.693	Yes
Broad	BARD1	BOKU	Cervix	Cervical Carcinoma	-0.75198	-1.524	Yes
Broad	BARD1	C-33-A	Cervix	Cervical Carcinoma	-0.74373	-2.2065	Yes
Broad	BARD1	Ca-Ski	Cervix	Cervical Carcinoma	-0.70109	-2.066	Yes
Broad	BARD1	SISO	Cervix	Cervical Carcinoma	-0.49889	-0.929	Yes
Broad	BARD1	SF767	Cervix	Cervical Carcinoma	-0.49684	-0.3835	Yes
Broad	BARD1	SKG-II	Cervix	Cervical Carcinoma	-0.47733	-0.6595	Yes
Broad	BARD1	SiHa	Cervix	Cervical Carcinoma	-1.0711	NA	No
Broad	BARD1	DoTc2-4510	Cervix	Cervical Carcinoma	-0.40491	0.311	No
Broad	BARD1	SW756	Cervix	Cervical Carcinoma	-0.15866	2.151	No
Source?	Gene	Model	Tissue	Cancer type	Corrected log fold change?	Loss of fitness score?	Essential gene
Broad	TAF5	HT-3	Cervix	Cervical Carcinoma	-1.23438	-4.894	Yes
Broad	TAF5	HCS-2	Cervix	Cervical Carcinoma	-1.0434	-4.07	Yes
Broad	TAF5	C-33-A	Cervix	Cervical Carcinoma	-0.88069	-3.1535	Yes
Broad	TAF5	SKG-II	Cervix	Cervical Carcinoma	-0.76597	-2.7115	Yes
Broad	TAF5	SW756	Cervix	Cervical Carcinoma	-0.73217	-2.315	Yes
Broad	TAF5	SISO	Cervix	Cervical Carcinoma	-0.65591	-2.449	Yes
Broad	TAF5	Ca-Ski	Cervix	Cervical Carcinoma	-0.60348	-1.496	Yes
Broad	TAF5	DoTc2-4510	Cervix	Cervical Carcinoma	-0.23073	1.582	No
Broad	TAF5	HCA1	Cervix	Cervical Carcinoma	-0.22396	2.3025	No
Broad	TAF5	BOKU	Cervix	Cervical Carcinoma	-0.19825	2.094	No
Broad	TAF5	SF767	Cervix	Cervical Carcinoma	-0.16606	2.1945	No
Broad	TAF5	SKG-I	Cervix	Cervical Carcinoma	-0.15664	3.123	No
Broad	TAF5	C-4-II	Cervix	Cervical Carcinoma	-0.136	2.7625	No
Broad	TAF5	SiHa	Cervix	Cervical Carcinoma	NA	NA	No
Source?	Gene	Model	Tissue	Cancer type	Corrected log fold change?	Loss of fitness score?	Essential gene
Broad	CDK2	HT-3	Cervix	Cervical Carcinoma	-1.55536	-6.996	Yes
Broad	CDK2	SKG-I	Cervix	Cervical Carcinoma	-1.47332	-4.886	Yes
Broad	CDK2	SW756	Cervix	Cervical Carcinoma	-1.15156	-5.67	Yes
Broad	CDK2	SKG-II	Cervix	Cervical Carcinoma	-1.05806	-4.9325	Yes
Broad	CDK2	DoTc2-4510	Cervix	Cervical Carcinoma	-0.98736	-3.643	Yes
Broad	CDK2	HCS-2	Cervix	Cervical Carcinoma	-0.88449	-2.682	Yes
Broad	CDK2	C-33-A	Cervix	Cervical Carcinoma	-0.63894	-1.4825	Yes
Broad	CDK2	Ca-Ski	Cervix	Cervical Carcinoma	-0.56735	-1.077	Yes
Broad	CDK2	SISO	Cervix	Cervical Carcinoma	-0.4673	-0.688	Yes
Broad	CDK2	SiHa	Cervix	Cervical Carcinoma	NA	-0.8445	Yes
Broad	CDK2	HCA1	Cervix	Cervical Carcinoma	-0.60742	0.0475	No
Broad	CDK2	BOKU	Cervix	Cervical Carcinoma	-0.54839	0.004	No
Broad	CDK2	C-4-II	Cervix	Cervical Carcinoma	-0.39399	0.8675	No
Broad	CDK2	SF767	Cervix	Cervical Carcinoma	-0.37057	0.4845	No
Source?	Gene	Model	Tissue	Cancer type	Corrected log fold change?	Loss of fitness score?	Essential gene
Broad	RNF168	HT-3	Cervix	Cervical Carcinoma	-1.71212	-8.475	Yes
Broad	RNF168	C-33-A	Cervix	Cervical Carcinoma	-1.61566	-8.7055	Yes
Broad	RNF168	Ca-Ski	Cervix	Cervical Carcinoma	-0.73303	-2.316	Yes
Broad	RNF168	HCA1	Cervix	Cervical Carcinoma	-0.65371	-0.3735	Yes
Broad	RNF168	SKG-II	Cervix	Cervical Carcinoma	-0.63431	-1.7665	Yes
Broad	RNF168	C-4-II	Cervix	Cervical Carcinoma	-0.56285	-0.3215	Yes
Broad	RNF168	HCS-2	Cervix	Cervical Carcinoma	-0.48096	-0.122	Yes
Broad	RNF168	SISO	Cervix	Cervical Carcinoma	-0.47283	-0.716	Yes
Broad	RNF168	SW756	Cervix	Cervical Carcinoma	-0.30613	0.915	No
Broad	RNF168	SKG-I	Cervix	Cervical Carcinoma	-0.23194	2.624	No
Broad	RNF168	DoTc2-4510	Cervix	Cervical Carcinoma	-0.20142	1.799	No
Broad	RNF168	SF767	Cervix	Cervical Carcinoma	-0.11992	2.6405	No
Broad	RNF168	BOKU	Cervix	Cervical Carcinoma	-0.025	3.172	No
Broad	RNF168	SiHa	Cervix	Cervical Carcinoma	NA	0.3935	No
Source?	Gene	Model	Tissue	Cancer type	Corrected log fold change?	Loss of fitness score?	Essential gene
Broad	RMI1	Ca-Ski	Cervix	Cervical Carcinoma	-2.14148	-13.292	Yes
Broad	RMI1	C-4-II	Cervix	Cervical Carcinoma	-1.2752	-5.6855	Yes
Broad	RMI1	BOKU	Cervix	Cervical Carcinoma	-1.11852	-3.612	Yes
Broad	RMI1	SISO	Cervix	Cervical Carcinoma	-1.11662	-6.121	Yes
Broad	RMI1	DoTc2-4510	Cervix	Cervical Carcinoma	-0.8293	-2.55	Yes
Broad	RMI1	HCA1	Cervix	Cervical Carcinoma	-0.82823	-1.3765	Yes
Broad	RMI1	SKG-II	Cervix	Cervical Carcinoma	-0.36727	-0.0025	Yes
Broad	RMI1	SF767	Cervix	Cervical Carcinoma	-0.3791	0.6975	No
Broad	RMI1	HCS-2	Cervix	Cervical Carcinoma	-0.28914	1.213	No
Broad	RMI1	SiHa	Cervix	Cervical Carcinoma	-0.287	2.3215	No
Broad	RMI1	SW756	Cervix	Cervical Carcinoma	-0.16659	2.083	No
Broad	RMI1	C-33-A	Cervix	Cervical Carcinoma	-0.15075	2.2255	No
Broad	RMI1	HT-3	Cervix	Cervical Carcinoma	-0.08763	1.828	No
Broad	RMI1	SKG-I	Cervix	Cervical Carcinoma	0.63421	7.964	No
Broad	BRCA1	HCA1	Cervix	Cervical Carcinoma	-1.21737	-3.8375	Yes
Broad	BRCA1	C-33-A	Cervix	Cervical Carcinoma	-0.5956	-1.5295	Yes
Broad	BRCA1	SF767	Cervix	Cervical Carcinoma	-0.53978	-0.7945	Yes
Broad	BRCA1	Ca-Ski	Cervix	Cervical Carcinoma	-0.41807	0.002	No
Broad	BRCA1	SKG-II	Cervix	Cervical Carcinoma	-0.40725	0.0125	No
Broad	BRCA1	SKG-I	Cervix	Cervical Carcinoma	-0.3899	1.639	No
Broad	BRCA1	HCS-2	Cervix	Cervical Carcinoma	-0.38581	0.547	No
Broad	BRCA1	BOKU	Cervix	Cervical Carcinoma	-0.37854	0.969	No
Broad	BRCA1	SISO	Cervix	Cervical Carcinoma	-0.37487	0.499	No
Broad	BRCA1	DoTc2-4510	Cervix	Cervical Carcinoma	-0.36571	0.634	No
Broad	BRCA1	SW756	Cervix	Cervical Carcinoma	-0.20288	1.77	No
Broad	BRCA1	HT-3	Cervix	Cervical Carcinoma	-0.13134	2.074	No
Broad	BRCA1	C-4-II	Cervix	Cervical Carcinoma	-0.04442	3.4775	No
Broad	BRCA1	SiHa	Cervix	Cervical Carcinoma	NA	NA	No
Broad	TBL1XR1	SF767	Cervix	Cervical Carcinoma	-1.74141	-10.5285	Yes
Broad	TBL1XR1	SKG-I	Cervix	Cervical Carcinoma	-0.86771	-1.208	Yes
Broad	TBL1XR1	Ca-Ski	Cervix	Cervical Carcinoma	-0.8075	-2.926	Yes
Broad	TBL1XR1	BOKU	Cervix	Cervical Carcinoma	-0.80507	-1.514	Yes
Broad	TBL1XR1	SKG-II	Cervix	Cervical Carcinoma	-0.42799	-0.1665	Yes
Broad	TBL1XR1	DoTc2-4510	Cervix	Cervical Carcinoma	-0.4322	0.225	No
Broad	TBL1XR1	C-4-II	Cervix	Cervical Carcinoma	-0.32614	1.4155	No
Broad	TBL1XR1	HT-3	Cervix	Cervical Carcinoma	-0.26785	0.89	No
Broad	TBL1XR1	C-33-A	Cervix	Cervical Carcinoma	-0.18986	1.9295	No
Broad	TBL1XR1	SW756	Cervix	Cervical Carcinoma	0.04986	3.882	No
Broad	TBL1XR1	HCA1	Cervix	Cervical Carcinoma	0.1831	4.7545	No
Broad	TBL1XR1	HCS-2	Cervix	Cervical Carcinoma	0.18636	4.742	No
Broad	TBL1XR1	SISO	Cervix	Cervical Carcinoma	0.32116	5.832	No
Broad	TBL1XR1	SiHa	Cervix	Cervical Carcinoma	NA	NA	No
Broad	PAK2	HT-3	Cervix	Cervical Carcinoma	-0.9142	-3.069	Yes
Broad	PAK2	SKG-I	Cervix	Cervical Carcinoma	-0.51322	0.904	No
Broad	PAK2	SiHa	Cervix	Cervical Carcinoma	-0.44552	1.0655	No
Broad	PAK2	SISO	Cervix	Cervical Carcinoma	-0.3286	0.582	No
Broad	PAK2	Ca-Ski	Cervix	Cervical Carcinoma	-0.31845	0.676	No
Broad	PAK2	SF767	Cervix	Cervical Carcinoma	-0.30736	1.1375	No
Broad	PAK2	HCA1	Cervix	Cervical Carcinoma	-0.26331	2.0845	No
Broad	PAK2	DoTc2-4510	Cervix	Cervical Carcinoma	-0.25743	1.394	No
Broad	PAK2	C-4-II	Cervix	Cervical Carcinoma	-0.25701	1.9075	No
Broad	PAK2	C-33-A	Cervix	Cervical Carcinoma	-0.24424	1.5075	No
Broad	PAK2	SW756	Cervix	Cervical Carcinoma	-0.05667	2.941	No
Broad	PAK2	SKG-II	Cervix	Cervical Carcinoma	-0.03089	2.8245	No
Broad	PAK2	HCS-2	Cervix	Cervical Carcinoma	0.05958	3.523	No
Broad	PAK2	BOKU	Cervix	Cervical Carcinoma	0.22648	4.623	No
Broad	NASP	HT-3	Cervix	Cervical Carcinoma	-1.15547	-4.944	Yes
Broad	NASP	SISO	Cervix	Cervical Carcinoma	-0.69211	-2.605	Yes
Broad	NASP	SF767	Cervix	Cervical Carcinoma	-0.6402	-1.6335	Yes
Broad	NASP	DoTc2-4510	Cervix	Cervical Carcinoma	-0.53507	-0.505	Yes
Broad	NASP	Ca-Ski	Cervix	Cervical Carcinoma	-0.49801	-0.676	Yes
Broad	NASP	BOKU	Cervix	Cervical Carcinoma	-0.42062	0.773	No
Broad	NASP	HCA1	Cervix	Cervical Carcinoma	-0.3562	1.5265	No
Broad	NASP	C-4-II	Cervix	Cervical Carcinoma	-0.32936	1.3915	No
Broad	NASP	SKG-I	Cervix	Cervical Carcinoma	-0.08106	3.494	No
Broad	NASP	SW756	Cervix	Cervical Carcinoma	0.00056	3.286	No
Broad	NASP	HCS-2	Cervix	Cervical Carcinoma	0.06023	3.506	No
Broad	NASP	C-33-A	Cervix	Cervical Carcinoma	0.10855	4.1305	No
Broad	NASP	SKG-II	Cervix	Cervical Carcinoma	0.29511	5.4865	No
Broad	NASP	SiHa	Cervix	Cervical Carcinoma	NA	1.7925	No
Broad	SUZ12	C-4-II	Cervix	Cervical Carcinoma	-0.71748	-1.6525	Yes
Broad	SUZ12	SISO	Cervix	Cervical Carcinoma	-0.54758	-1.417	Yes
Broad	SUZ12	C-33-A	Cervix	Cervical Carcinoma	-0.45778	-0.2305	Yes
Broad	SUZ12	HT-3	Cervix	Cervical Carcinoma	-0.40873	0.017	No
Broad	SUZ12	DoTc2-4510	Cervix	Cervical Carcinoma	-0.38662	0.576	No
Broad	SUZ12	SKG-I	Cervix	Cervical Carcinoma	-0.3575	1.856	No
Broad	SUZ12	SW756	Cervix	Cervical Carcinoma	-0.26903	1.347	No
Broad	SUZ12	HCA1	Cervix	Cervical Carcinoma	-0.07783	3.1825	No
Broad	SUZ12	Ca-Ski	Cervix	Cervical Carcinoma	-0.00898	3.069	No
Broad	SUZ12	BOKU	Cervix	Cervical Carcinoma	-0.0014	3.308	No
Broad	SUZ12	HCS-2	Cervix	Cervical Carcinoma	0.11699	3.9	No
Broad	SUZ12	SF767	Cervix	Cervical Carcinoma	0.13512	4.7455	No
Broad	SUZ12	SKG-II	Cervix	Cervical Carcinoma	0.24129	5.0835	No
Broad	SUZ12	SiHa	Cervix	Cervical Carcinoma	NA	1.8945	No
